# The presence and impact of reference bias on population genomic studies of prehistoric human populations

Torsten Günther<sup>§,\*</sup> & Carl Nettelblad<sup>‡</sup>

December 17, 2018

Running title: Reference bias in ancient DNA data

<sup>§</sup>Human Evolution, Department of Organismal Biology, Uppsala University, Uppsala, Sweden

<sup>‡</sup>Division of Scientific Computing, Department of Information Technology, Science for Life Laboratory, Uppsala University, Uppsala, Sweden.

\*Corresponding author: Department of Organismal Biology, Evolutionary Biology Centre, Uppsala University, Norbyvägen 18C, 752 36 Uppsala, Sweden; E-mail: [torsten.guenther@ebc.uu.se](mailto:torsten.guenther@ebc.uu.se)

## Abstract

High quality reference genomes are an important resource in genomic research projects. A consequence is that DNA fragments carrying the reference allele will be more likely to map successfully, or receive higher quality scores. This reference bias can have effects on downstream population genomic analysis when heterozygous sites are falsely considered homozygous for the reference allele.

In palaeogenomic studies of human populations, mapping against the human reference genome is used to identify endogenous human sequences. Ancient DNA studies usually operate with low sequencing coverages and fragmentation of DNA molecules causes a large proportion of the sequenced fragments to be shorter than 50 bp – reducing the amount of accepted mismatches, and increasing the probability of multiple matching sites in the genome. These ancient DNA specific properties are potentially exacerbating the impact of reference bias on downstream analyses, especially since most studies of ancient human populations use pseudo-haploid data, i.e. they randomly sample only one sequencing read per site.

We show that reference bias is pervasive in published ancient DNA sequence data of prehistoric humans with some differences between individual genomic regions. We illustrate that the strength of reference bias is negatively correlated with fragment length. Reference bias can cause differences in the results of downstream analyses such as population affinities, heterozygosity estimates and estimates of archaic ancestry. These spurious results highlight how important it is to be aware of these technical artifacts and that we need strategies to mitigate the effect. Therefore, we suggest some post-mapping filtering strategies to resolve reference bias which help to reduce its impact substantially.

## Introduction

1 The possibility to sequence whole genomes in a cost-efficient way has revolutionized the way how  
2 we do genetic and population genetic research. Annotated, high-quality reference genomes are a  
3 cornerstone for resequencing surveys which aim to study the genetic variation and demographic  
4 history of an entire species. Resequencing studies usually align the sequences of all studied in-  
5 dividuals to a linear haploid reference sequence originating from a single individual or a mosaic  
6 of several individuals. In each site, this haploid sequence will only represent a single allele out  
7 of the entire genetic variation of the species. An inherent consequence is some degree of bias to-  
8 wards the alleles present in that reference sequence (“reference bias”). Sequencing reads carrying

9 an alternative allele will naturally have mismatches in the alignment to the reference genome and  
10 consequently have lower mapping scores than reads carrying the same allele as the reference. This  
11 effect increases with genetic distance from the reference genome, which is of particular interest  
12 when using a reference genome from a related species for mapping (Shapiro and Hofreiter, 2014;  
13 Gopalakrishnan et al., 2017; Heintzman et al., 2017). Generally, reference bias can influence vari-  
14 ant calling by missing alternative alleles or by wrongly calling heterozygous sites as homozygous  
15 reference (Bobo et al., 2016; Ros-Freixedes et al., 2018) which is known to influence estimates of  
16 heterozygosity and allele frequencies (Chen et al., 2012; Bryc et al., 2013; Brandt et al., 2015).

17 The field of palaeogenomics and the population genomic analysis of DNA obtained from hominin  
18 remains has led to a number of important insights and groundbreaking results in recent years,  
19 including admixture between different hominin groups, migrations of prehistoric humans and the  
20 evolution of different phenotypes (Günther and Jakobsson, 2016; Slatkin and Racimo, 2016; Nielsen  
21 et al., 2017; Dannemann and Racimo, 2018; Lazaridis, 2018; Skoglund and Mathieson, 2018). DNA  
22 preservation poses a major challenge for these studies, as fragmentation causes most authentic  
23 sequences to be shorter than 100 bp, and deamination damage increases the number of mismatches  
24 and can even mimic genetic variation at transition sites (Hofreiter et al., 2001; Brotherton et al.,  
25 2007; Briggs et al., 2007).

26 In addition to fragmentation and other post-mortem damages, low coverage data is a major  
27 limiting factor for ancient DNA studies. Coverages below 1x rarely permit calling diploid genotypes  
28 so a very common approach is to use “pseudo-haploid” data: at each known single nucleotide  
29 polymorphisms (SNP) site one sequencing read is picked at random (or following a majority rule)  
30 in order to represent a haploid genotype of that individual. This approach would not introduce bias  
31 if the reads were a random representation of the chromosomes carried by the individual. Reference  
32 bias, however, would introduce some skew towards the reference allele at heterozygous sites. These  
33 characteristics of ancient DNA and practices used in palaeogenomic studies make them particularly  
34 vulnerable to reference bias (Prüfer et al., 2010; Schubert et al., 2012). It has been shown that  
35 pseudo-haploid data can be more biased than imputed genotypes (Martiniano et al., 2017), and  
36 that reference bias and fragment length artifacts can interfere with phylogenetic classifications  
37 (Heintzman et al., 2017). Reference bias can influence downstream analyses if these are based on  
38 estimating allele frequencies in a population, or studying pairwise allele sharing between individuals  
39 and groups.

40 This study investigates the presence and impact of reference bias in studies of prehistoric  
41 human populations using genomic ancient DNA. We first illustrate its abundance in published  
42 data from ancient human and archaic hominins, and illustrate how it is influenced by standard  
43 data processing. We then show how reference bias can influence some basic population genetic

44 analyses such as population affinities and heterozygosity. Finally, we discuss some possible data  
45 filtering strategies in order to mitigate reference bias in ancient DNA studies.

## 46 Results

Table 1: Information on the published medium to high coverage palaeogenomic and archaeogenomic data used in this study.

| Sample ID         | (Partial) UDG treatment <sup>§</sup> | SNP capture | Average sequencing depth <sup>†</sup> | Reference                |
|-------------------|--------------------------------------|-------------|---------------------------------------|--------------------------|
| Stuttgart         | X                                    |             | 15.8x                                 | Lazaridis et al. (2014)  |
| Loschbour         | X                                    |             | 17.7x                                 | Lazaridis et al. (2014)  |
| Ust-Ishim         | X                                    |             | 29.9x                                 | Fu et al. (2014)         |
| sf12              | X                                    |             | 64.7x                                 | Günther et al. (2018)    |
| baa001            | X                                    |             | 13.2x                                 | Schlebusch et al. (2017) |
| Kotias            |                                      |             | 12.5x                                 | Jones et al. (2015)      |
| Bichon            |                                      |             | 15.4x                                 | Jones et al. (2015)      |
| ne1               |                                      |             | 18.5x                                 | Gamba et al. (2014)      |
| br2               |                                      |             | 15.4x                                 | Gamba et al. (2014)      |
| atp016            |                                      |             | 14.1x                                 | Valdiosera et al. (2018) |
| Rathlin1          |                                      |             | 10.9x                                 | Cassidy et al. (2015)    |
| Ballynahatty      |                                      |             | 10.7x                                 | Cassidy et al. (2015)    |
| I0054             | X                                    | X           | 2.4x                                  | Mathieson et al. (2015)  |
| I0103             | X                                    | X           | 2.4x                                  | Mathieson et al. (2015)  |
| I0118             | X                                    | X           | 1.7x                                  | Mathieson et al. (2015)  |
| I0172             | X                                    | X           | 3.4x                                  | Mathieson et al. (2015)  |
| I0408             | X                                    | X           | 1.7x                                  | Mathieson et al. (2015)  |
| I0412             | X                                    | X           | 1.9x                                  | Mathieson et al. (2015)  |
| I0585             | X                                    | X           | 2.4x                                  | Mathieson et al. (2015)  |
| AltaiNeandertal   | X                                    |             | 45.2x                                 | Prüfer et al. (2014)     |
| VindijaNeandertal | X                                    |             | 25.9x                                 | Prüfer et al. (2017)     |
| Denisovan         | X                                    |             | 26.7x                                 | Meyer et al. (2012)      |

<sup>§</sup> Enzymatic repair of deamination damages

<sup>†</sup> at analyzed SGDP SNPs, using a minimum mapping quality of 30

## 47 Mapping quality filtering

48 We first investigate whether reference bias is present in published ancient DNA data. We restrict  
49 our analysis to known SNPs, as most population genomic analyses are using SNPs and the allele  
50 frequencies at those positions. In particular, we are only using transversion polymorphisms (to  
51 avoid the effect of post-mortem deaminations) and sites identified to be polymorphic in a world-wide  
52 set of modern human populations (Mallick et al., 2016). We investigate supposedly heterozygous  
53 sites (defined as sites covered by at least 10 reads with at least 25% representing the minor allele)  
54 in a set of published medium to high coverage human and hominin genomes (Table 1). We note  
55 that our approach does not include any rescaling of base qualities, as such approaches usually take  
56 the reference allele into account which may amplify reference bias.

57 At a heterozygous site, a DNA extract of an individual should contain the same number of ref-  
58 erence and alternative fragments. We observe that after mapping to the human reference genome  
59 the average proportion of alternative alleles is lower than the expected 50 percent for all of the  
60 anatomically modern humans investigated (Figure 1), regardless of whether they represent SNP  
61 capture data, damage repaired libraries or standard shotgun sequencing (Table 1). As sequence  
62 fragments carrying the alternative allele will show an elevated number of mismatches to the refer-  
63 ence genome, mapping quality seems a natural filter to avoid reference bias. Consistent with this  
64 expectation, we see a slightly stronger reference bias for stricter mapping quality filters. Lowering  
65 the mapping quality cutoff can have other detrimental effects, however, for example an enrichment  
66 of microbial contamination (Renaud et al., 2017) or sequences not uniquely mapping to a particular  
67 region of the genome. This is somewhat illustrated by the archaic genomes, two Neandertals and  
68 a Denisovan, which show - on average - a bias towards the alternative allele when no mapping  
69 quality filter is employed (Figure 1). This suggests that these more distant taxa carry variation in  
70 the genome which is not captured by the reference genome based on anatomically modern humans,  
71 in turn causing fragments originating in other parts of the genome to map at the investigated sites.  
72 As the qualities of the base calls have not been rescaled after mapping to the reference genome, we  
73 do not see an effect of different minimum base quality thresholds on reference bias (Supplementary  
74 Figure 1).

75 Investigating pairwise correlations between the proportion of alternative alleles at sites con-  
76 sidered heterozygous in both individuals shows significantly positive correlations in most cases  
77 (Supplementary Table 1). This indicates that the strength of reference (and alternative) bias may  
78 differ regionally across the genome, so there could be an effect of sequence context and uniqueness  
79 of the specific sequences across the genome. The highest correlations are observed between samples  
80 from the same study or produced by the same institute suggesting that similar wet lab techniques  
81 also influence this effect.

## 82 **Distribution of bias**

83 To investigate the distribution of reference bias instead of just averages as above, we modified  
84 original reads to carry opposite alleles at each SNP site and remapped them. We created a virtual  
85 read set for the Scandinavian Mesolithic hunter-gatherer sf12 (Günther et al., 2018) containing  
86 reads for all SNPs identified with mapping quality and base quality of at least 30 in the original  
87 mapping. No filter was placed on coverage, a SNP was included even if it was only covered by a  
88 single read. This joint read set of original and modified reads thus had perfectly balanced allele  
89 ratios for all SNPs. The full set was remapped, and SNPs were grouped based on the observed  
90 alternative allele fraction among all reads that again mapped to their respective SNPs with mapping

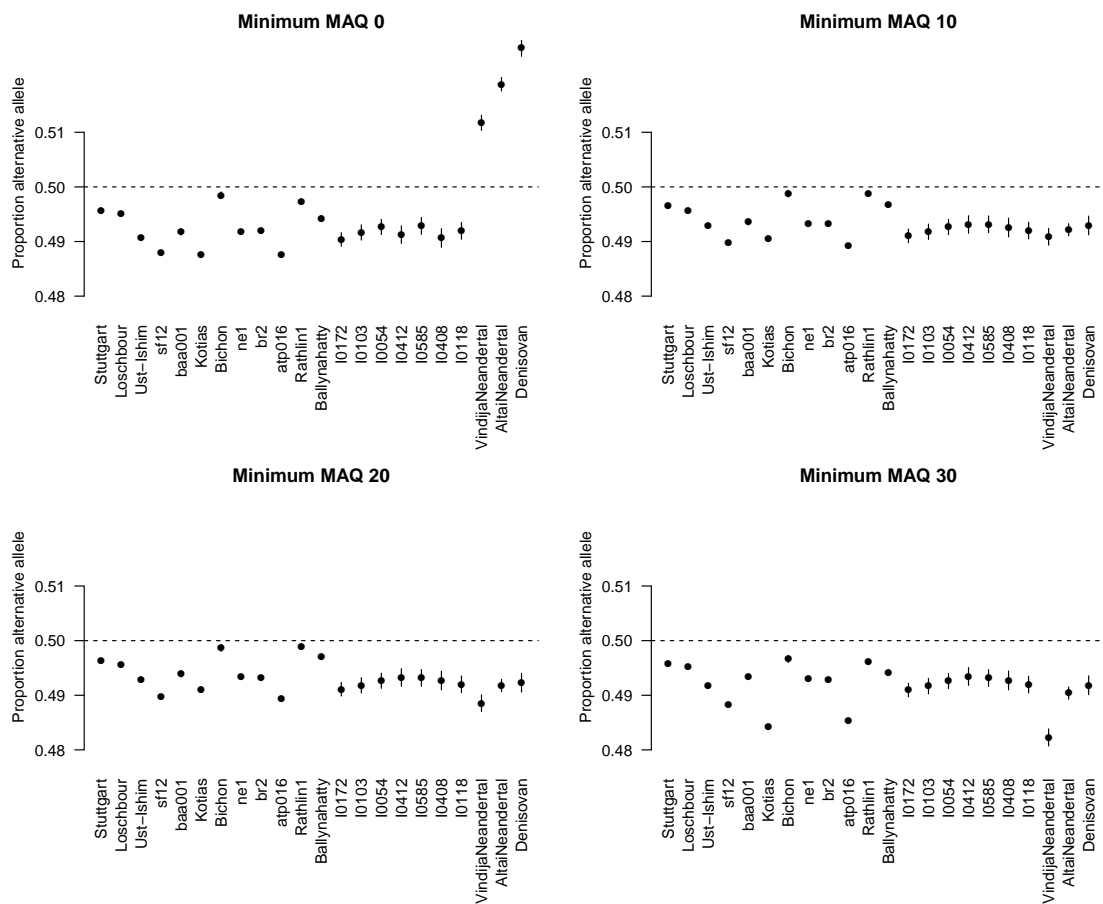

Figure 1: Reference bias in published genome-wide ancient DNA datasets for different minimum mapping quality thresholds. The plots show the average proportion of reads at heterozygous transversion sites (see Methods) representing the alternative allele. Error bars indicate two standard errors of the mean.

91 quality of at least 30.

92 In total, 1,157,266 SNPs were analyzed. Out of these, 1,088,802 (94.08%) showed perfect allelic  
 93 balance, with a proportion of alternative alleles of 0.5. About 100 SNPs were also affected by reads  
 94 that mapped back with sufficient quality, but to a different genomic location. In these results, we  
 95 only present proportions based on reads that map back to their original location from the first  
 96 mapping round. The proportion of alternative alleles is summarized in Table 2. Notably, there  
 97 is a subset of SNPs showing alternative, as opposed to reference, bias, and also a subset of SNPs  
 98 where the bias is total, i.e. only one of the two alleles is ever mapped back successfully (within this  
 99 dataset). The distribution across the genome of sites deviating from the balanced case is similar  
 100 to the overall density of the SNPs used. Generally, all chromosomes and chromosomal regions are  
 101 affected.

Table 2: Proportion of alternative alleles when mapping back original reads and virtual opposite allele reads for the sf12 individual.

| Proportion of alternative alleles | # SNPs  | Percentage |
|-----------------------------------|---------|------------|
| 0                                 | 11497   | 0.99%      |
| (0, 0.4)                          | 12962   | 1.12%      |
| [0.4, 0.5)                        | 37262   | 3.22%      |
| 0.5                               | 1088802 | 94.08%     |
| (0.5, 0.6]                        | 4172    | 0.36%      |
| (0.6, 1)                          | 1413    | 0.12%      |
| 1                                 | 1158    | 0.10%      |

## 102 The influence of fragment length

103 Most mapping strategies set the number of allowed mismatches relative to the length of the se-  
104 quenced fragment. Therefore, shorter fragments might show a stronger reference bias than long  
105 fragments. To investigate this, we used the 57x genome generated for the Scandinavian Mesolithic  
106 hunter-gatherer sf12 (Günther et al., 2018) and partitioned the data into fragment length bins.  
107 The large amount of data allows us to still have a sufficient number of SNPs covered at 10x or  
108 more for each of the length bins.

109 Somewhat expectedly, shorter fragments display a stronger reference bias than longer sequences  
110 (Figure 2A). Generally, fragment length might be a main driver of reference bias across all samples  
111 as the mode of each individual’s fragment size distribution is highly correlated with the average  
112 proportion of alternative alleles at heterozygous sites (Pearson’s  $r = 0.67$ ,  $p = 0.0006$ ; Figure 2B).  
113 This also has an effect on the proportion of sites considered heterozygous among all sites analyzed  
114 which can be seen as a relative measure for the individual’s heterozygosity (Figure 2C). In fact,  
115 different fragment length bins of the same individual produce heterozygosity estimates that do  
116 not overlap in their 95% confidence interval (Figure 2C). This represents a general limitation for  
117 estimating heterozygosity from ancient DNA data which may to some degree explain the generally  
118 low diversity estimates for many prehistoric groups (e.g. Skoglund et al., 2014; Kousathanas et al.,  
119 2017; Scheib et al., 2018). The potential of obtaining significantly different estimates for the same  
120 population genetic statistic may also have enormous effects on other downstream analyses such as  
121 population affinities and population structure.

## 122 Impact on measures of population affinity

123 In order to investigate the influence of reference bias on population affinities, we calculated dif-  
124 ferent combinations of  $D$  statistics of the form  $D(\textit{Chimp}, X; Y, Z)$ , where  $X$  is a modern human  
125 population, and  $Y$  and  $Z$  are two different treatments of the same individual sf12. Therefore, the  
126 expectation for  $D$  is 0, but differences in reference bias between  $Y$  and  $Z$  could lead to spurious  
127 allele sharing between population  $X$  and a deviation from 0. Negative values of  $D$  indicate more

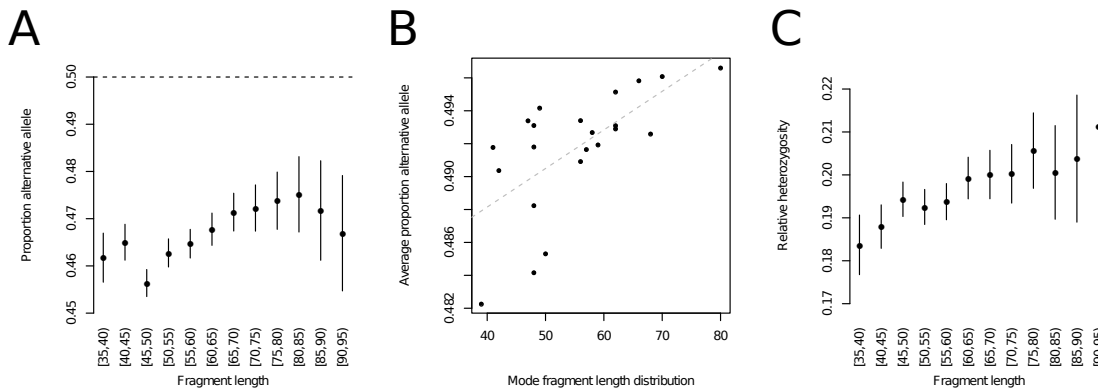

Figure 2: Connection between fragment length and reference bias. (A) Proportion of alternative allele for different fragment length bins in the high coverage individual sf12. (B) Correlation between average proportion of alternative alleles and the mode of the fragment size distribution across all investigated individuals. (C) Proportion of heterozygous sites among all sites with sufficient coverage for different fragment length bins in the high coverage individual sf12. All error bars indicate two standard errors.

128 allele sharing of  $X$  with  $Y$  while positive values indicate an excess of shared alleles between  $X$   
 129 and  $Z$ . The populations  $X$  were grouped by continental origin and we calculated the statistics  
 130 separately for whole genome shotgun data (SGDP, Mallick et al., 2016) and genotyped populations  
 131 (HO, Lazaridis et al., 2014).

132 We use four different versions of genotypes for sf12. First, we compare pseudo-haploid calls  
 133 (random allele per site with minimum mapping and base quality of 30) to diploid genotype calls  
 134 (Figure 3A and C). This comparison assumes that the diploid calls are less affected by reference  
 135 bias as slight deviations from a 50/50-ratio at heterozygous sites should be tolerated by a diploid  
 136 genotype caller but random sampling would be biased towards the reference allele. This is sup-  
 137 ported by the  $D$  statistic  $D(chimp, reference; sf12\_hapl, sf12\_dipl) < 0$  ( $Z = -13.5$ ), indicating  
 138 more allele sharing between the reference and the pseudo-haploid calls. For this illustration, we  
 139 are using diploid genotype calls from *GATK* as we are only looking at the variation at known SNP  
 140 sites. We note that genotype callers specifically developed for ancient DNA (Link et al., 2017;  
 141 Zhou et al., 2017; Prüfer, 2018) are preferable when calling novel variants from ancient DNA data  
 142 as they incorporate post-mortem damage and other ancient DNA specific properties. Second, we  
 143 compare randomly sampled reads of different fragment length categories (Figure 3B and D) as  
 144 longer (75-80 bp) fragments should exhibit less reference bias than short (35-40 bp) fragments (see  
 145 above), which is supported by the  $D$  statistic  $D(chimp, reference; sf12\_short, sf12\_long) < 0$   
 146 ( $Z = -20.6$ ), indicating more allele sharing between the reference and pseudo-haploid calls from  
 147 short fragments.

148 In general, we observe a deviation from zero in most cases highlighting the effect of reference bias  
 149 on these statistics (Figure 3). Surprisingly, the directions of this bias differ between the HO data

150 and the SGDP data, which suggests that different reference data sets are also affected by reference  
 151 bias at different degrees. This represents a potential batch effect which also needs to be considered  
 152 when merging different reference data sets. Affinities to populations of different geographic origin  
 153 vary in their sensitivity to reference bias but little general trends are observable. Western Eurasian  
 154 populations show a strong deviation from 0 in all tests. Notably, African populations show the  
 155 strongest deviation in the short versus long comparison in the SGDP data set while they exhibit  
 156 almost no bias in the same comparison using the HO data. As the biases do not seem to show  
 157 a consistent tendency, we cannot directly conclude that recent ancient DNA papers have been  
 158 systematically biased in some direction. The shifts appear to be dataset and test specific so some  
 159 results could still be driven by spurious affinities due to reference bias.

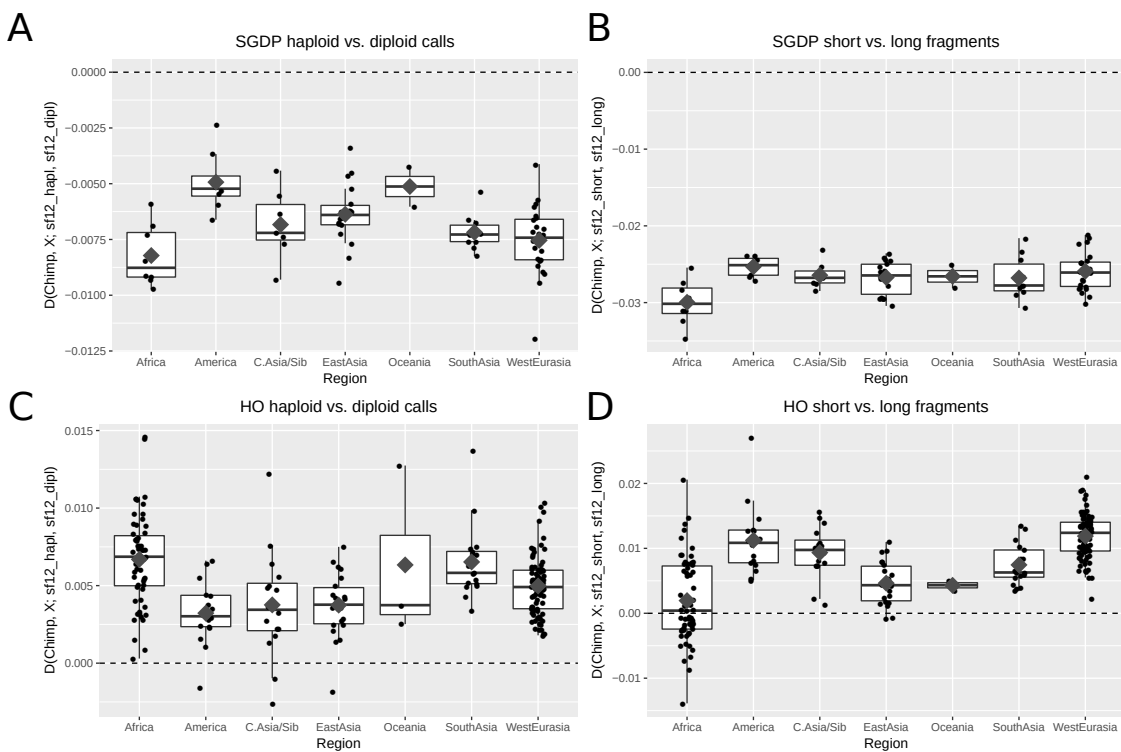

Figure 3:  $D$  statistics testing the affinity between different modern populations ( $X$ ) and two different treatments of the high coverage individual  $sf12$ . The basis for these comparisons are the modern sequence data of the SGDP panel (A and B) or genotype data from the HO panel (C and D). Comparisons are done between pseudo-haploid and diploid calls for  $sf12$  (A and C), and between pseudo-haploid calls from short (35-40 bp) or long (75-80 bp) fragments (B and D). The x axis represents the geographic origin of population  $X$ , diamonds show the mean for each continental group.

160 The human reference genome sequence is a mosaic of the genomes of different individuals. The  
 161 geographic origin of the specific segments should have an impact on the population genetic affin-  
 162 ties as the reference allele will more likely be found in specific geographic regions. We obtained  
 163 information on the local ancestry of the human reference genome from Green et al. (2010). Ac-  
 164 cording to this estimate 15.6 % of the reference genome can be assigned to African, 5.0 % to East



165 Asian and 30.0 % to European origin while the origin for 49.4 % is uncertain. We re-calculate  
 166  $D$  statistics for the different parts of the genome separately, restricting the analysis to the SGDP  
 167 data. The impact of reference bias differs between the different ancestries (Figure 4). Generally,  
 168 reference bias is weakest for reference segments of African origin. Notably, African populations  
 169 show the strongest deviations from 0 in this case. Sequences mapping to the European segments of  
 170 the reference show a strong reference bias with slight differences between continental populations.  
 171 Reference bias at the East Asian segments of the reference genome seems intermediate but the  $D$   
 172 statistics also show large variation which may be due to the only small proportion of the reference  
 173 genome that could confidently be assigned to an East Asian origin (Green et al., 2010).

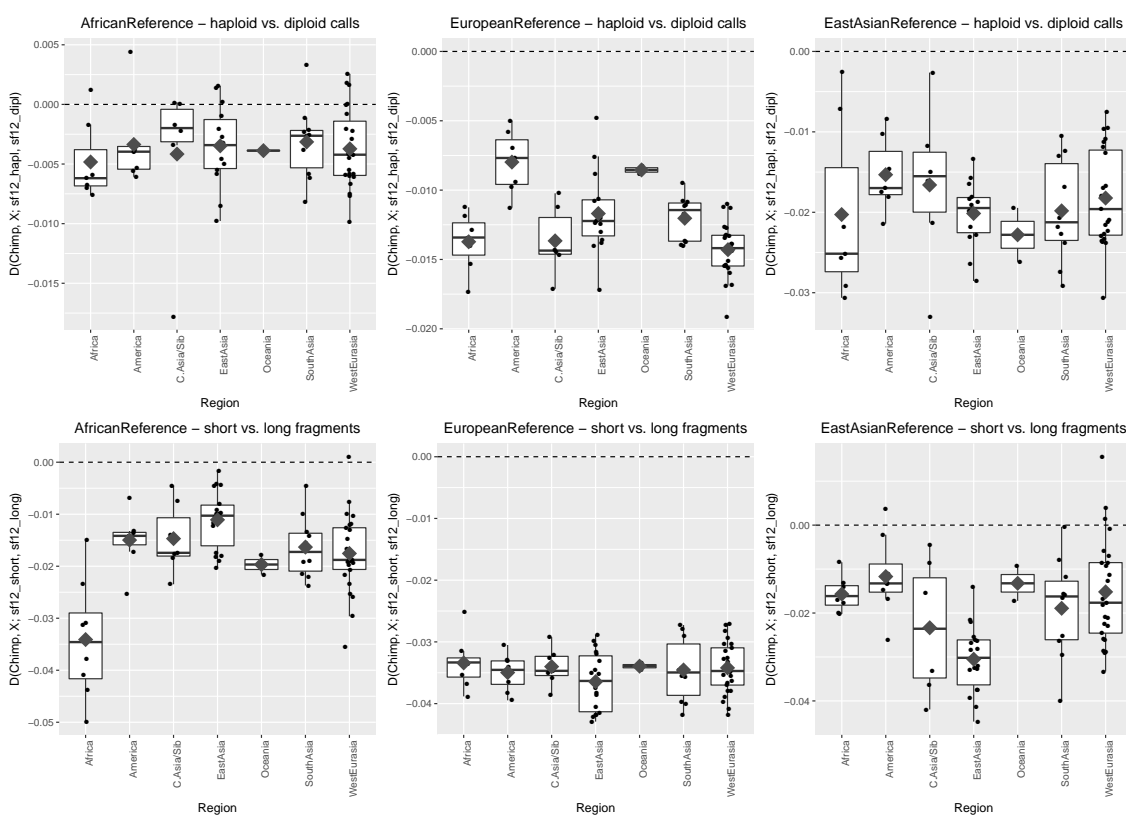

Figure 4:  $D$  statistics similar to Figure 3 for different parts of the reference genome depending on their geographic origin (Green et al., 2010). The x axis represents the geographic origin of population  $X$ , diamonds show the mean for each continental group.

174 Finally, we explore whether reference bias can affect estimates of archaic ancestry. We estimate  
 175 the Neandertal ancestry proportion in sf12 as done by Prüfer et al. (2017):

$$\alpha = \frac{f_4(\text{sf12}, \text{Mbuti}; \text{AltaiNea}, \text{Chimp})}{f_4(\text{VindijaNea}, \text{Mbuti}; \text{AltaiNea}, \text{Chimp})}$$

176 We use eight different combinations of diploid and pseudo-haploid calls for sf12 as well as the  
 177 two Neandertals in this statistic (Table 3). The 95% confidence intervals of all estimates overlap  
 178 but point estimates differ by up to 1.25% when using all pseudo-haploid versus all diploid calls.

179 The African segments of the reference genome yield the lowest point estimates (as low as 1.42%)  
 180 – some of these estimates are not even significantly different from 0. These differences highlight  
 181 some of the sensitivities of  $f_4$ -ratios not just to the choice of reference populations (Petr et al.,  
 182 2018) but also to technical artifacts.

Table 3: Percentage of Neandertal ancestry (and standard errors) in sf12 using diploid and pseudo-haploid calls and different subsets of the human reference genome. Parts of the genome of East Asian origin were excluded due to their small total size.

| Statistic <sup>§</sup>                        | Full reference  | European Reference | African Reference |
|-----------------------------------------------|-----------------|--------------------|-------------------|
| $f_4(sf12_h, Mbuti; AltaiNea_h, Chimp)$       | $3.15 \pm 0.44$ | $3.11 \pm 0.80$    | $2.47 \pm 1.01$   |
| $f_4(VindijaNea_h, Mbuti; AltaiNea_h, Chimp)$ | $2.54 \pm 0.44$ | $2.70 \pm 0.80$    | $1.91 \pm 1.01$   |
| $f_4(sf12_d, Mbuti; AltaiNea_d, Chimp)$       | $2.22 \pm 0.43$ | $2.76 \pm 0.77$    | $1.91 \pm 0.98$   |
| $f_4(VindijaNea_d, Mbuti; AltaiNea_d, Chimp)$ | $2.79 \pm 0.43$ | $2.32 \pm 0.76$    | $1.42 \pm 0.98$   |
| $f_4(sf12_h, Mbuti; AltaiNea_h, Chimp)$       | $2.68 \pm 0.45$ | $2.43 \pm 0.80$    | $2.59 \pm 1.01$   |
| $f_4(VindijaNea_d, Mbuti; AltaiNea_h, Chimp)$ | $2.10 \pm 0.44$ | $2.07 \pm 0.79$    | $2.03 \pm 1.00$   |
| $f_4(VindijaNea_d, Mbuti; AltaiNea_d, Chimp)$ | $2.45 \pm 0.44$ | $2.22 \pm 0.77$    | $2.12 \pm 0.97$   |
| $f_4(sf12_d, Mbuti; AltaiNea_h, Chimp)$       | $1.90 \pm 0.44$ | $1.81 \pm 0.76$    | $1.63 \pm 0.97$   |
| $f_4(VindijaNea_d, Mbuti; AltaiNea_d, Chimp)$ |                 |                    |                   |

<sup>§</sup>  $d$  and  $h$  denote diploid and pseudo haploid-calls, respectively

## 183 Potential data filtering strategies

184 After establishing the abundance and potential effect of reference bias, we investigated two simple  
 185 post-mapping filtering approaches to mitigate reference bias. The two agents involved in the  
 186 process are the reference genome and the sequence fragments or reads. We investigated 1,407,340  
 187 of the SGDP transversion set of sites with at least 200 bp distance between two neighboring SNPs.  
 188 First, we modified reads that successfully mapped to a SNP site with a match of the reference allele  
 189 to carry the alternative allele. These modified reads were re-mapped to the reference genome and  
 190 they passed the filtering if they still mapped to the same position of the genome with no indels.  
 191 Second, we prepared a modified version of the reference genome which carried a third base (neither  
 192 the reference base nor the known alternative allele) at all 1,407,340 sites. A similar approach has  
 193 been used to study ultra-short fragments in sequence data from archaic hominins (de Filippo et al.,  
 194 2018). All reads originally mapping to the SNP sites were re-mapped to this modified reference  
 195 genome, and again only reads that mapped to the same location and without indels passed the  
 196 filtering. Finally, we used both filters on the same BAM file. All scripts used for filtering can be  
 197 found at <https://bitbucket.org/tguenther/refbias/>

198 The filtering approaches increase the average proportion of the alternative allele at homozygous  
 199 sites (Figure 5A). Mapping to a modified reference genome shows a slightly better improvement  
 200 than using modified reads, while combining both yields the best results in most cases. A small  
 201 number of samples shows a 50/50-ratio after filtering but most are still significantly below that

202 ratio. This is not surprising as the filtering is only applied to reads that have previously mapped to  
 203 a single reference genome so the data before filtering does not represent a 50/50-ratio, and removing  
 204 some reference allele reads cannot completely account for the non-reference reads lost earlier. This  
 205 is most evident in the data from Mathieson et al. (2015) which was only available as mapped  
 206 reads after running *bwa* (Li and Durbin, 2009) with lower maximum edit distance parameters (-n  
 207 0.04) than our pipeline which does not leave much room for improvement after filtering. Another  
 208 possible reason for deviation from a 50/50-ratio at heterozygous sites could be low levels of modern  
 209 contamination which may lead to a slight over-representation of the reference allele before mapping  
 210 (Prüfer et al., 2014; Racimo et al., 2016; Prüfer, 2018). Comparing the outcome of the filters to  
 211 different fragment length categories shows a similar pattern: the bias is decreased but some length  
 212 categories still display differences in their relative heterozygosity (Figure 5B).

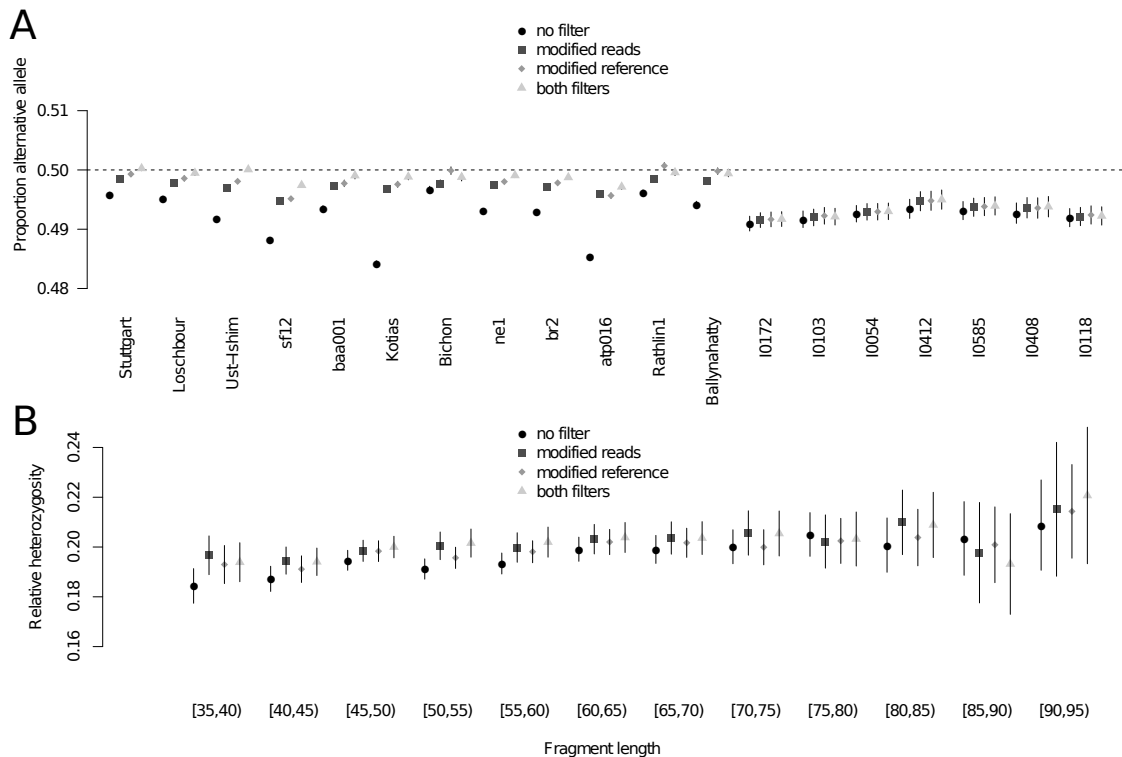

Figure 5: Comparison of different post-mapping filtering strategies for high coverage bam files from anatomically modern humans employing mapping and base quality filters of 30. (A) Average proportion of the alternative allele for the comparison between no additional filters (see also Figure 1), remapping of reads carrying the reference allele modified to carry the alternative allele (modified reads), remapping against a modified reference carrying a third allele at the SNP sites, and both filters together. (B) Influence of filtering on measures of heterozygosity for different fragment sizes in sf12. Error bars indicate two standard errors.

## 213 Discussion

214 Systematic biases are problematic in all types of quantitative research, and it is therefore important  
215 to be aware of them and alleviate or avoid their effects as much as possible. Different systematic  
216 biases in next-generation sequencing data have been investigated before (Prüfer et al., 2010; Ross  
217 et al., 2013; Bobo et al., 2016; Ros-Freixedes et al., 2018), and it is known parameters such as  
218 sequencing depth can influence population genomic estimates (Crawford and Lazzaro, 2012; Fu-  
219 magalli, 2013; Korneliussen et al., 2013). Differences in sequencing strategies (e.g. read length) and  
220 bioinformatic processing have been shown to generate batch effects and dramatically affect down-  
221 stream analyses (Leek et al., 2010; Leigh et al., 2018; Shafer et al., 2016; Mafessoni et al., 2018).  
222 Another well known bias in population genetics is ascertainment bias which arises when the studied  
223 variants were ascertained in selected populations only, and can substantially impact measurements  
224 of heterozygosity and related methods (Albrechtsen et al., 2010). The research community is aware  
225 of these potential issues and they are avoided by filtering strategies, standardizing bioinformatic  
226 pipelines, including controls and accounting for systematic biases in downstream analysis.

227 The common use of randomly sampled alleles and pseudo-haploid data in palaeogenomic re-  
228 search can exacerbate the effect of reference bias compared to diploid genotype calls obtained from  
229 medium to high coverage data. We show that reference bias is able to lead to significant differ-  
230 ences between estimates of population genetic parameters (heterozygosity), overestimated levels  
231 of archaic ancestry as well as to cause spurious affinities to certain populations. Mixing different  
232 mapping parameters or minimum fragment lengths in the same study should generally be avoided.  
233 Additionally, strong differences of fragment size distributions between different individuals may  
234 cause spurious affinities due to reference bias. Many estimates from low coverage data are gener-  
235 ally noisy, but studies show increasing sample sizes and amounts of data which means that subtle  
236 biases become of increasing importance in the future. Notably, the bias for the whole genome  
237 (Figure 3) seems less extreme than some of the results for ancestry-specific segments (Figure 4)  
238 suggesting that the mosaic nature of the human reference genome may reduce the bias to some  
239 degree as different regions will be biased in different directions. In this respect the human refer-  
240 ence genome is different from many other species where the reference genome is derived from a  
241 single individual which would increase the potential impact of reference bias on population genetic  
242 analysis in other systems.

243 Our analysis does not directly indicate a strong direct impact of different wet lab procedures  
244 on the observed average degree of reference bias. We caution, however, that such an effect may  
245 exist as indicated by the correlations between samples processed in the same lab (Supplementary  
246 Table 1). Different library preparation techniques produce different length distributions since  
247 some approaches are directly targeting shorter fragments which will have an impact on mapping.

248 Furthermore, the SNP capture approaches used to generate the data we analyzed uses one bait  
249 per allele minimizing reference bias before sequencing. Most whole genome or exome capture  
250 approaches, however, are using baits designed from a single individual which should introduce a  
251 pre-mapping bias towards the allele carried by that person (Quail et al., 2008; Heinrich et al., 2012;  
252 Meynert et al., 2013; Lindo et al., 2016). Finally, contamination from another person should tend  
253 to introduce the major allele which is likely the reference allele in most cases – a process that will  
254 also increase reference bias before mapping (Prüfer et al., 2014; Racimo et al., 2016; Prüfer, 2018).

255 Our analysis of the distribution of reference bias across the genome for the sf12 individual  
256 has several repercussions. First, most reads are neutral to changing the allele to its opposing  
257 counterpart. This leads to a possible alternative filtering strategy. In cases where a pre-defined set  
258 of variants is acceptable, a quality control should be performed on the study level to filter out SNPs  
259 which correspond to reads that do not survive this alternative mapping. The exact details of such  
260 a filter will, again, be dependent on the expected length and degradation of the reads. Another  
261 important observation is that reference bias does not operate alone. There is also a weaker, but  
262 very clear, signal of alternative allele bias, affecting roughly 0.6% of the total SNPs. In addition,  
263 both reference and alternative bias can sometimes be very strong on the level of individual SNPs.  
264 Even in a dataset with an overall proportion of alternative reads close to 0.5 in heterozygous sites  
265 overall, subsets of SNPs might perform very differently, again possibly confusing deeper forms of  
266 analysis that do not only consider genome-wide metrics – for example selection scans or analysis  
267 of loci involved in certain traits.

268 We show, that filtering steps can reduce but not completely eliminate reference bias at SNPs  
269 after mapping. To fully prevent reference bias, alternative mapping strategies would be needed  
270 or filtering strategies would have to be developed for all raw data which is not always published.  
271 Furthermore, these proposed filters require a pre-defined set of variants used for downstream anal-  
272 ysis and are not suitable for calling novel variants from ancient DNA data. The latter, however,  
273 will generally be only restricted to high quality and high coverage samples. A recently developed  
274 genotype caller for ancient DNA data estimates reference bias from the data and uses the estimate  
275 as a parameter for variant calling (Prüfer, 2018), which seems to work well for samples sequenced  
276 to coverages of 15x or higher. One could use the filtering steps tested by us in a similar manner to  
277 estimate what proportion of reads in a library are affected by reference bias which could later be  
278 used to estimate genotype likelihoods (Nielsen et al., 2011; Wang et al., 2013). As reference bias  
279 is somewhat predictable and detectable, this offers opportunities to account for it in downstream  
280 analyses (e.g. Bryc et al., 2013; Wu et al., 2017).

281 Alternative mapping strategies such as mapping against genome graphs (Paten et al., 2017;  
282 Garrison et al., 2018) or multiple reference genomes simultaneously (Schneeberger et al., 2009)

283 could be able to eliminate reference bias already in the mapping step. These approaches are not  
284 broadly established in human genomics yet but their development has huge potential with regard  
285 to reference bias. Such approaches could also lead to an increase in the total amount of authentic  
286 data that can be obtained from a library while post-mapping filters will reduce the amount of data  
287 used for downstream analyses (between 2 and 10 % in our cases). In addition to filtering data  
288 and standardizing bioinformatic pipelines for all samples used in a study (both published data and  
289 newly sequenced), we propose simulations as a potential control. Specific ancient DNA simulation  
290 suites (Renaud et al., 2017) provide the opportunity to simulate data exactly matching fragment  
291 size and damage patterns of empirical ancient DNA data so one can use them to study if observed  
292 patterns may be driven by reference bias alone.

293 The present study focused mainly on humans but the effect of reference bias extends to other  
294 species as well. The slight alternative bias in archaic hominins and the different population affinities  
295 depending on the geographic origin of the reference genome illustrate that increasing evolutionary  
296 distance can exacerbate reference bias or even cause systematic alternative bias at some sites.  
297 This suggests that mapping against a reference genome of a related species (in the absence of a  
298 reference genome for the species in focus) may impact downstream analyses as well (Green et al.,  
299 2010; Schubert et al., 2012; Shapiro and Hofreiter, 2014; Gopalakrishnan et al., 2017), but the  
300 population genetic bias may be weaker as the reference genome employed usually represents an  
301 outgroup of equal distance to all individuals in the studied species.

## 302 Conclusion

303 Our analysis highlights that reference bias is pervasive in ancient DNA data used to study pre-  
304 historic populations. While the strength of the effect differs between applications and data set,  
305 it is clear that reference bias has the potential to create spurious results in population genomic  
306 analyses. Furthermore, even when the overall presence of bias is limited, it is important to assess  
307 whether subsets of variants are prone to strong systematic bias, including the possible presence of  
308 alternative bias.

309 We are entering a time where sample sizes in ancient DNA studies reach one hundred and  
310 beyond, while the questions focus on more and more detailed patterns and subtle differences. At  
311 the same time, sampling starts to involve older remains and remains from more challenging en-  
312 vironments – both of which are usually associated with poor preservation and shorter fragments.  
313 Therefore it seems crucial to avoid reference bias or other biases such as batch effects or ascertain-  
314 ment biases as much as possible, and to develop and apply computational strategies to mitigate  
315 the impact of these issues.

## 316 **Materials and Methods**

### 317 **Data sets and bioinformatic processing**

318 We selected medium to high coverage data from 22 different individuals representing data generated  
319 by different research groups with different wet lab strategies, covering different geographic regions  
320 and time periods (Table 1). For anatomically modern human samples, we tried to use data as raw  
321 as possible but some publications only provided the data after mapping and filtering. The general  
322 pipeline for these samples was identical to previous studies (Günther et al., 2015, 2018). Reads  
323 were mapped to the 1000 genomes version of the human reference genome hg19 using *bwa* (Li and  
324 Durbin, 2009) with non-default parameters `-l 16500 -n 0.01 -o 2`. Subsequently, PCR duplicates  
325 and fragments shorter than 35 bp were filtered (Kircher, 2012).

326 We restricted our analysis to a set of known transversion variants to avoid an effect of post-  
327 mortem damage. We selected 107,404 transversions from the Human Origins panel (Patterson  
328 et al., 2012; Lazaridis et al., 2014) as well as 1,693,337 transversions which were at at least 5%  
329 allele frequency in the public data of the Simons Genome Diversity Project (SGDP, Mallick et al.,  
330 2016). To detect reference bias, we are looking at supposedly heterozygous sites where one would  
331 expect reads to map in a 50/50-ratio on average if no bias existed. We define a heterozygous site  
332 as a SNP for which we observe at least ten reads with between 25 to 75% of those representing  
333 the alternative allele. These reads are assessed using *samtools mpileup* (version 1.5, Li et al., 2009)  
334 employing the `-B` option to turn off base quality rescaling.

335 For the high coverage genome of sf12 (Günther et al., 2018) as well as the high coverage archaic  
336 genomes (Meyer et al., 2012; Prüfer et al., 2014, 2017) we also generated diploid genotype calls  
337 following the pipeline described in Günther et al. (2018). Briefly, base qualities of all Ts in the  
338 first five base pairs of each read as well as all As in the last five base pairs were set to 2. *Picard*  
339 version 1.118 (Broad Institute, 2016) was used to add read groups to the files followed by indel  
340 realignment with *GATK* 3.5.0 (McKenna et al., 2010) based on reference indels identified in phase  
341 1 of the 1000 genomes project (Auton et al., 2015). Finally, diploid genotypes were called with  
342 *GATK*'s UnifiedGenotyper employing the parameters `-stand_call_conf 50.0, -stand_emit_conf`  
343 `50.0, -mbq 30, -contamination 0.02` and `-output_mode EMIT_ALL_SITES` using dbSNP version  
344 142 as known SNPs. Genotype calls not flagged as low quality calls at investigated SNP sites were  
345 extracted from the VCF files using *vcftools* (Danecek et al., 2011).

### 346 **Population genetic tests**

347 In order to investigate the population genetic effect of reference bias, we calculated  $D$  and  $f$   
348 statistics (Patterson et al., 2012). These statistics are based on pairwise allele sharing, so they

349 should be sensitive to spurious allele sharing due to reference bias.  $D$  statistics were calculated  
350 with *popstats* (Skoglund et al., 2015),  $f_4$  ratios were calculated *ADMIXTOOLS* (Patterson et al.,  
351 2012), and standard errors were calculated employing a weighted block jackknife with a block size  
352 of 5 Mbp. We used the chimpanzee reference genome as an outgroup.

## 353 Data Access

354 All scripts used for filtering can be found at <https://bitbucket.org/tguenther/refbias/>

## 355 Acknowledgements

356 We are grateful to Arielle Munters, Federico Sanchez, Mattias Jakobsson, and other members of the  
357 Human Evolution research program for discussions and comments as well as the attendees of various  
358 early presentations on this topic for their input and encouragement to turn it into a manuscript. We  
359 also thank Arielle Munters for initial data processing and Shop Mallick for sharing the local ancestry  
360 information for the human reference genome. The computations were performed on resources  
361 provided by SNIC through Uppsala Multidisciplinary Center for Advanced Computational Science  
362 (UPPMAX) under projects sllstore2017087, uppstore2018139, SNIC 2018/8-106 and 2018/8-239.  
363 TG was supported by grants from the Swedish Research Council Vetenskapsrådet and The Royal  
364 Physiographic Society of Lund (Nilsson-Ehle Endowments), as well as a Knut och Alice Wallenbergs  
365 Stiftelse grant to Mattias Jakobsson. CN was supported by a grant from the Swedish Research  
366 Council for Environment, Agricultural Sciences and Spatial Planning (FORMAS).

## 367 References

- 368 Albrechtsen, A., Nielsen, F. C., and Nielsen, R., 2010. Ascertainment Biases in SNP Chips Affect  
369 Measures of Population Divergence. *Molecular Biology and Evolution*, **27**(11):2534–2547.
- 370 Auton, A., Abecasis, G. R., Altshuler, D. M., Durbin, R. M., Abecasis, G. R., Bentley, D. R.,  
371 Chakravarti, A., Clark, A. G., Donnelly, P., Eichler, E. E., et al., 2015. A global reference for  
372 human genetic variation. *Nature*, **526**(7571):68–74.
- 373 Bobo, D., Lipatov, M., Rodriguez-Flores, J. L., Auton, A., and Henn, B. M., 2016. False Negatives  
374 Are a Significant Feature of Next Generation Sequencing Callsets. *bioRxiv*, :066043.
- 375 Brandt, D. Y. C., Aguiar, V. R. C., Bitarello, B. D., Nunes, K., Goudet, J., and Meyer, D.,  
376 2015. Mapping Bias Overestimates Reference Allele Frequencies at the HLA Genes in the 1000  
377 Genomes Project Phase I Data. *G3: Genes, Genomes, Genetics*, **5**(5):931–941.



- 378 Briggs, A. W., Stenzel, U., Johnson, P. L., Green, R. E., Kelso, J., Prüfer, K., Meyer, M., Krause,  
379 J., Ronan, M. T., Lachmann, M., *et al.*, 2007. Patterns of damage in genomic DNA sequences  
380 from a Neandertal. *Proceedings of the National Academy of Sciences*, **104**(37):14616–14621.
- 381 Broad Institute, 2016. Picard tools. <https://broadinstitute.github.io/picard/>, .
- 382 Brotherton, P., Endicott, P., Sanchez, J. J., Beaumont, M., Barnett, R., Austin, J., and Cooper, A.,  
383 2007. Novel high-resolution characterization of ancient DNA reveals C> U-type base modification  
384 events as the sole cause of post mortem miscoding lesions. *Nucleic acids research*, **35**(17):5717–  
385 5728.
- 386 Bryc, K., Patterson, N. J., and Reich, D., 2013. A Novel Approach to Estimating Heterozygosity  
387 from Low-Coverage Genome Sequence. *Genetics*, :genetics.113.154500.
- 388 Cassidy, L. M., Martiniano, R., Murphy, E. M., Teasdale, M. D., Mallory, J., Hartwell, B., and  
389 Bradley, D. G., 2015. Neolithic and Bronze Age migration to Ireland and establishment of the  
390 insular Atlantic genome. *Proceedings of the National Academy of Sciences*, :1–6.
- 391 Chen, X., Listman, J. B., Slack, F. J., Gelernter, J., and Zhao, H., 2012. Biases and Errors on  
392 Allele Frequency Estimation and Disease Association Tests of Next-Generation Sequencing of  
393 Pooled Samples. *Genetic Epidemiology*, **36**(6):549–560.
- 394 Crawford, J. E. and Lazzaro, B. P., 2012. Assessing the accuracy and power of population genetic  
395 inference from low-pass next-generation sequencing data. *Frontiers in Genetics*, **3**:66.
- 396 Danecek, P., Auton, A., Abecasis, G., Albers, C. A., Banks, E., DePristo, M. A., Handsaker, R. E.,  
397 Lunter, G., Marth, G. T., Sherry, S. T., *et al.*, 2011. The variant call format and VCFtools.  
398 *Bioinformatics (Oxford, England)*, **27**(15):2156–2158.
- 399 Dannemann, M. and Racimo, F., 2018. Something old, something borrowed: admixture and  
400 adaptation in human evolution. *Current Opinion in Genetics & Development*, **53**:1–8.
- 401 de Filippo, C., Meyer, M., and Prüfer, K., 2018. Quantifying and reducing spurious alignments for  
402 the analysis of ultra-short ancient DNA sequences. *BMC Biology*, **16**(1):121.
- 403 Fu, Q., Li, H., Moorjani, P., Jay, F., Slepchenko, S. M., Bondarev, A. A., Johnson, P. L. F.,  
404 Aximu-Petri, A., Prüfer, K., de Filippo, C., *et al.*, 2014. Genome sequence of a 45,000-year-old  
405 modern human from western Siberia. *Nature*, **514**(7523):445–449.
- 406 Fumagalli, M., 2013. Assessing the Effect of Sequencing Depth and Sample Size in Population  
407 Genetics Inferences. *PLOS ONE*, **8**(11):e79667.

- 408 Gamba, C., Jones, E. R., Teasdale, M. D., McLaughlin, R. L., Gonzalez-Fortes, G., Mattiangeli,  
409 V., Domboroczki, L., Kövári, I., Pap, I., Anders, A., *et al.*, 2014. Genome flux and stasis in a  
410 five millennium transect of European prehistory. *Nature Communications*, **5**:5257.
- 411 Garrison, E., Sirén, J., Novak, A. M., Hickey, G., Eizenga, J. M., Dawson, E. T., Jones, W., Garg,  
412 S., Markello, C., Lin, M. F., *et al.*, 2018. Variation graph toolkit improves read mapping by  
413 representing genetic variation in the reference. *Nature Biotechnology*, .
- 414 Gopalakrishnan, S., Samaniego Castruita, J. A., Sinding, M.-H. S., Kuderna, L. F. K., Rääkkönen,  
415 J., Petersen, B., Sicheritz-Ponten, T., Larson, G., Orlando, L., Marques-Bonet, T., *et al.*, 2017.  
416 The wolf reference genome sequence (*Canis lupus lupus*) and its implications for *Canis* spp.  
417 population genomics. *BMC Genomics*, **18**:495.
- 418 Green, R. E., Krause, J., Briggs, A. W., Maricic, T., Stenzel, U., Kircher, M., Patterson, N., Li,  
419 H., Zhai, W., Fritz, M. H.-Y., *et al.*, 2010. A draft sequence of the Neandertal genome. *Science*  
420 (*New York, N.Y.*), **328**(5979):710–22.
- 421 Günther, T. and Jakobsson, M., 2016. Genes mirror migrations and cultures in prehistoric Europe—a  
422 population genomic perspective. *Current Opinion in Genetics & Development*, **41**:115–123.
- 423 Günther, T., Malmström, H., Svensson, E. M., Omrak, A., Sánchez-Quinto, F., Kılınç, G. M.,  
424 Krzewińska, M., Eriksson, G., Fraser, M., Edlund, H., *et al.*, 2018. Population genomics of  
425 Mesolithic Scandinavia: Investigating early postglacial migration routes and high-latitude adap-  
426 tation. *PLoS biology*, **16**(1):e2003703.
- 427 Günther, T., Valdiosera, C., Malmström, H., Ureña, I., Rodriguez-Varela, R., Sverrisdottir, O. O.,  
428 Daskalaki, E. A., Skoglund, P., Naidoo, T., Svensson, E. M., *et al.*, 2015. Ancient genomes  
429 link early farmers from Atapuerca in Spain to modern-day Basques. *Proceedings of the National*  
430 *Academy of Sciences of the United States of America*, **112**(38):11917–11922.
- 431 Heinrich, V., Stange, J., Dickhaus, T., Imkeller, P., Krüger, U., Bauer, S., Mundlos, S., Robinson,  
432 P. N., Hecht, J., and Krawitz, P. M., *et al.*, 2012. The allele distribution in next-generation  
433 sequencing data sets is accurately described as the result of a stochastic branching process.  
434 *Nucleic Acids Research*, **40**(6):2426–2431.
- 435 Heintzman, P. D., Zazula, G. D., MacPhee, R. D., Scott, E., Cahill, J. A., McHorse, B. K., Kapp,  
436 J. D., Stiller, M., Wooller, M. J., Orlando, L., *et al.*, 2017. A new genus of horse from Pleistocene  
437 North America. *eLife*, **6**.
- 438 Hofreiter, M., Jaenicke, V., Serre, D., Haeseler, A. v., and Pääbo, S., 2001. DNA sequences from

- 439 multiple amplifications reveal artifacts induced by cytosine deamination in ancient DNA. *Nucleic*  
440 *acids research*, **29**(23):4793–4799.
- 441 Jones, E. R., Gonzalez-Fortes, G., Connell, S., Siska, V., Eriksson, A., Martiniano, R., McLaughlin,  
442 R. L., Gallego Llorente, M., Cassidy, L. M., Gamba, C., *et al.*, 2015. Upper Palaeolithic genomes  
443 reveal deep roots of modern Eurasians. *Nature communications*, **6**:8912.
- 444 Kircher, M., 2012. Analysis of high-throughput ancient DNA sequencing data. volume 840, pages  
445 197–228.
- 446 Korneliussen, T. S., Moltke, I., Albrechtsen, A., and Nielsen, R., 2013. Calculation of Tajima’s  
447 D and other neutrality test statistics from low depth next-generation sequencing data. *BMC*  
448 *bioinformatics*, **14**:289.
- 449 Kousathanas, A., Leuenberger, C., Link, V., Sell, C., Burger, J., and Wegmann, D., 2017. Inferring  
450 Heterozygosity from Ancient and Low Coverage Genomes. *Genetics*, **205**(1):317–332.
- 451 Lazaridis, I., 2018. The evolutionary history of human populations in Europe. *Current Opinion*  
452 *in Genetics & Development*, **53**:21–27.
- 453 Lazaridis, I., Patterson, N., Mittnik, A., Renaud, G., Mallick, S., Kirsanow, K., Sudmant, P. H.,  
454 Schraiber, J. G., Castellano, S., Lipson, M., *et al.*, 2014. Ancient human genomes suggest three  
455 ancestral populations for present-day Europeans. *Nature*, **513**(7518):409–413.
- 456 Leek, J. T., Scharpf, R. B., Bravo, H. C., Simcha, D., Langmead, B., Johnson, W. E., Geman, D.,  
457 Baggerly, K., and Irizarry, R. A., 2010. Tackling the widespread and critical impact of batch  
458 effects in high-throughput data. *Nature Reviews Genetics*, **11**(10):733–739.
- 459 Leigh, D. M., Lischer, H. E. L., Grossen, C., and Keller, L. F., 2018. Batch effects in a multiyear  
460 sequencing study: False biological trends due to changes in read lengths. *Molecular Ecology*  
461 *Resources*, **0**(0).
- 462 Li, H. and Durbin, R., 2009. Fast and accurate short read alignment with Burrows-Wheeler  
463 transform. *Bioinformatics (Oxford, England)*, **25**(14):1754–1760.
- 464 Li, H., Handsaker, B., Wysoker, A., Fennell, T., Ruan, J., Homer, N., Marth, G., Abecasis, G.,  
465 Durbin, R., and 1000 Genome Project Data Processing Subgroup, *et al.*, 2009. The Sequence  
466 Alignment/Map format and SAMtools. *Bioinformatics (Oxford, England)*, **25**(16):2078–2079.
- 467 Lindo, J., Huerta-Sánchez, E., Nakagome, S., Rasmussen, M., Petzelt, B., Mitchell, J., Cybulski,  
468 J. S., Willerslev, E., DeGiorgio, M., and Malhi, R. S., *et al.*, 2016. A time transect of exomes  
469 from a Native American population before and after European contact. *Nature Communications*,  
470 **7**:13175.

- 471 Link, V., Kousathanas, A., Veeramah, K., Sell, C., Scheu, A., and Wegmann, D., 2017. ATLAS:  
472 analysis tools for low-depth and ancient samples. *bioRxiv*, :105346.
- 473 Mafessoni, F., Prasad, R. B., Groop, L., Hansson, O., Prüfer, K., and McLysaght, A., 2018.  
474 Turning vice into virtue: Using Batch-Effects to Detect Errors in Large Genomic Datasets.  
475 *Genome Biology and Evolution*, .
- 476 Mallick, S., Li, H., Lipson, M., Mathieson, I., Gymrek, M., Racimo, F., Zhao, M., Chennagiri, N.,  
477 Nordenfelt, S., Tandon, A., *et al.*, 2016. The Simons Genome Diversity Project: 300 genomes  
478 from 142 diverse populations. *Nature*, **538**(7624):201–206.
- 479 Martiniano, R., Cassidy, L. M., Ó'Maoldúin, R., McLaughlin, R., Silva, N. M., Manco, L., Fidalgo,  
480 D., Pereira, T., Coelho, M. J., Serra, M., *et al.*, 2017. The population genomics of archaeological  
481 transition in west Iberia: Investigation of ancient substructure using imputation and haplotype-  
482 based methods. *PLoS genetics*, **13**(7):e1006852.
- 483 Mathieson, I., Lazaridis, I., Rohland, N., Mallick, S., Patterson, N., Roodenberg, S. A., Harney,  
484 E., Stewardson, K., Fernandes, D., Novak, M., *et al.*, 2015. Genome-wide patterns of selection  
485 in 230 ancient Eurasians. *Nature*, **528**(7583):499–503.
- 486 McKenna, A., Hanna, M., Banks, E., Sivachenko, A., Cibulskis, K., Kernytsky, A., Garimella, K.,  
487 Altshuler, D., Gabriel, S., Daly, M., *et al.*, 2010. The Genome Analysis Toolkit: A MapReduce  
488 framework for analyzing next-generation DNA sequencing data. *Genome Research*, **20**(9):1297–  
489 1303.
- 490 Meyer, M., Kircher, M., Gansauge, M.-T., Li, H., Racimo, F., Mallick, S., Schraiber, J. G., Jay,  
491 F., Prüfer, K., de Filippo, C., *et al.*, 2012. A high-coverage genome sequence from an archaic  
492 Denisovan individual. *Science (New York, N.Y.)*, **338**(6104):222–226.
- 493 Meynert, A. M., Bicknell, L. S., Hurles, M. E., Jackson, A. P., and Taylor, M. S., 2013. Quantifying  
494 single nucleotide variant detection sensitivity in exome sequencing. *BMC Bioinformatics*, **14**:195.
- 495 Nielsen, R., Akey, J. M., Jakobsson, M., Pritchard, J. K., Tishkoff, S., and Willerslev, E., 2017.  
496 Tracing the peopling of the world through genomics. *Nature*, **541**(7637):302–310.
- 497 Nielsen, R., Paul, J. S., Albrechtsen, A., and Song, Y. S., 2011. Genotype and SNP calling from  
498 next-generation sequencing data. *Nature Reviews Genetics*, **12**(6):443.
- 499 Paten, B., Novak, A. M., Eizenga, J. M., and Garrison, E., 2017. Genome graphs and the evolution  
500 of genome inference. *Genome Research*, **27**(5):665–676.
- 501 Patterson, N., Moorjani, P., Luo, Y., Mallick, S., Rohland, N., Zhan, Y., Genschoreck, T., Webster,  
502 T., and Reich, D., 2012. Ancient Admixture in Human History. *Genetics*, **192**(3):1065–1093.

- 503 Petr, M., Pääbo, S., Kelso, J., and Vernot, B., 2018. The limits of long-term selection against  
504 Neandertal introgression. *bioRxiv*, :362566.
- 505 Prüfer, K., 2018. snpAD: An ancient DNA genotype caller. *Bioinformatics*, .
- 506 Prüfer, K., Filippo, C. d., Grote, S., Mafessoni, F., Korlević, P., Hajdinjak, M., Vernot, B., Skov,  
507 L., Hsieh, P., Peyrégne, S., *et al.*, 2017. A high-coverage Neandertal genome from Vindija Cave  
508 in Croatia. *Science*, **358**(6363):655–658.
- 509 Prüfer, K., Racimo, F., Patterson, N., Jay, F., Sankararaman, S., Sawyer, S., Heinze, A., Renaud,  
510 G., Sudmant, P. H., de Filippo, C., *et al.*, 2014. The complete genome sequence of a Neanderthal  
511 from the Altai Mountains. *Nature*, **505**(7481):43–9.
- 512 Prüfer, K., Stenzel, U., Hofreiter, M., Pääbo, S., Kelso, J., and Green, R. E., 2010. Computational  
513 challenges in the analysis of ancient DNA. *Genome Biology*, **11**:R47.
- 514 Quail, M. A., Kozarewa, I., Smith, F., Scally, A., Stephens, P. J., Durbin, R., Swerdlow, H., and  
515 Turner, D. J., 2008. A large genome center’s improvements to the Illumina sequencing system.  
516 *Nature Methods*, **5**(12):1005–1010.
- 517 Racimo, F., Renaud, G., and Slatkin, M., 2016. Joint estimation of contamination, error and  
518 demography for nuclear DNA from ancient humans. *PLoS genetics*, **12**(4):e1005972.
- 519 Renaud, G., Hanghøj, K., Willerslev, E., and Orlando, L., 2017. gargammel: a sequence simulator  
520 for ancient DNA. *Bioinformatics*, **33**(4):577–579.
- 521 Ros-Freixedes, R., Battagin, M., Johnsson, M., Gorjanc, G., Mileham, A. J., Rounsley, S. D., and  
522 Hickey, J. M., 2018. Impact of index hopping and bias towards the reference allele on accuracy  
523 of genotype calls from low-coverage sequencing. *Genetics Selection Evolution*, **50**(1).
- 524 Ross, M. G., Russ, C., Costello, M., Hollinger, A., Lennon, N. J., Hegarty, R., Nusbaum, C.,  
525 and Jaffe, D. B., 2013. Characterizing and measuring bias in sequence data. *Genome Biology*,  
526 **14**(5):R51.
- 527 Scheib, C. L., Li, H., Desai, T., Link, V., Kendall, C., Dewar, G., Griffith, P. W., Mörseburg, A.,  
528 Johnson, J. R., Potter, A., *et al.*, 2018. Ancient human parallel lineages within North America  
529 contributed to a coastal expansion. *Science*, **360**(6392):1024–1027.
- 530 Schlebusch, C. M., Malmström, H., Günther, T., Sjödin, P., Coutinho, A., Edlund, H., Munters,  
531 A. R., Vicente, M., Steyn, M., Soodyall, H., *et al.*, 2017. Southern African ancient genomes  
532 estimate modern human divergence to 350,000 to 260,000 years ago. *Science (New York, N. Y.)*,  
533 .

- 534 Schneeberger, K., Hagmann, J., Ossowski, S., Warthmann, N., Gesing, S., Kohlbacher, O., and  
535 Weigel, D., 2009. Simultaneous alignment of short reads against multiple genomes. *Genome*  
536 *Biology*, **10**(9):R98.
- 537 Schubert, M., Ginolhac, A., Lindgreen, S., Thompson, J. F., AL-Rasheid, K. A., Willerslev, E.,  
538 Krogh, A., and Orlando, L., 2012. Improving ancient DNA read mapping against modern  
539 reference genomes. *BMC Genomics*, **13**:178.
- 540 Shafer, A. B. A., Peart, C. R., Tusso, S., Maayan, I., Brelsford, A., Wheat, C. W., and Wolf,  
541 J. B. W., 2016. Bioinformatic processing of RAD-seq data dramatically impacts downstream  
542 population genetic inference. *Methods in Ecology and Evolution*, **8**(8):907–917.
- 543 Shapiro, B. and Hofreiter, M., 2014. A paleogenomic perspective on evolution and gene function:  
544 new insights from ancient DNA. *Science (New York, N.Y.)*, **343**(6169):1236573.
- 545 Skoglund, P., Mallick, S., Bortolini, M. C., Chennagiri, N., Hünemeier, T., Petzl-Erler, M. L.,  
546 Salzano, F. M., Patterson, N., and Reich, D., 2015. Genetic evidence for two founding popula-  
547 tions of the Americas. *Nature*, **525**(7567):104–108.
- 548 Skoglund, P., Malmstrom, H., Omrak, A., Raghavan, M., Valdiosera, C., Gunther, T., Hall, P.,  
549 Tambets, K., Parik, J., Sjogren, K.-G., *et al.*, 2014. Genomic Diversity and Admixture Differs  
550 for Stone-Age Scandinavian Foragers and Farmers. *Science*, **344**(6185):747–750.
- 551 Skoglund, P. and Mathieson, I., 2018. Ancient Human Genomics: The First Decade. *Annual*  
552 *Review of Genomics and Human Genetics*, **19**(1):null.
- 553 Slatkin, M. and Racimo, F., 2016. Ancient DNA and human history. *Proceedings of the National*  
554 *Academy of Sciences of the United States of America*, **113**(23):6380–6387.
- 555 Valdiosera, C., Günther, T., Vera-Rodríguez, J. C., Ureña, I., Iriarte, E., Rodríguez-Varela, R.,  
556 Simões, L. G., Martínez-Sánchez, R. M., Svensson, E. M., Malmström, H., *et al.*, 2018. Four  
557 millennia of Iberian biomolecular prehistory illustrate the impact of prehistoric migrations at  
558 the far end of Eurasia. *Proceedings of the National Academy of Sciences*, :201717762.
- 559 Wang, Y., Lu, J., Yu, J., Gibbs, R. A., and Yu, F., 2013. An integrative variant analysis pipeline for  
560 accurate genotype/haplotype inference in population NGS data. *Genome Research*, **23**(5):833–  
561 842.
- 562 Wu, S. H., Schwartz, R. S., Winter, D. J., Conrad, D. F., and Cartwright, R. A., 2017. Estimating  
563 error models for whole genome sequencing using mixtures of Dirichlet-multinomial distributions.  
564 *Bioinformatics*, **33**(15):2322–2329.

565 Zhou, B., Wen, S., Wang, L., Jin, L., Li, H., and Zhang, H., 2017. AntCaller: an accurate variant  
566 caller incorporating ancient DNA damage. *Molecular Genetics and Genomics*, **292**(6):1419–1430.
