# The presence and impact of reference bias on population genomic studies of prehistoric human populations

Torsten Günther<sup>§,\*</sup> & Carl Nettelblad<sup>‡</sup>

December 5, 2018

<sup>§</sup>Human Evolution, Department of Organismal Biology, Uppsala University, Uppsala, Sweden

<sup>‡</sup>Division of Scientific Computing, Department of Information Technology, Science for Life Laboratory, Uppsala University, Uppsala, Sweden.

\*Corresponding author: E-mail: [torsten.guenther@ebc.uu.se](mailto:torsten.guenther@ebc.uu.se)

## Abstract

High quality reference genomes are an important resource in genomic research projects. A consequence is that DNA fragments carrying the reference allele will be more likely to map successfully, or receive higher quality scores. This reference bias can have effects on downstream population genomic analysis when heterozygous sites are falsely considered homozygous for the reference allele.

In palaeogenomic studies of human populations, mapping against the human reference genome is used to identify endogenous human sequences. Ancient DNA studies usually operate with low sequencing coverages and fragmentation of DNA molecules causes a large proportion of the sequenced fragments to be shorter than 50 bp – reducing the amount of accepted mismatches, and increasing the probability of multiple matching sites in the genome. These ancient DNA specific properties are potentially exacerbating the impact of reference bias on downstream analyses, especially since most studies of ancient human populations use pseudo-haploid data, i.e. they randomly sample only one sequencing read per site.

We show that reference bias is pervasive in published ancient DNA sequence data of prehistoric humans with some differences between individual genomic regions. We illustrate that the strength of reference bias is negatively correlated with fragment length. Reference bias can cause differences in the results of downstream analyses such as population affinities, heterozygosity estimates and estimates of archaic ancestry. These spurious results highlight how important it is to be aware of these technical artifacts and that we need strategies to mitigate the effect. Therefore, we suggest some post-mapping filtering strategies to resolve reference bias which help to reduce its impact substantially.

## Introduction

1 The possibility to sequence whole genomes in a cost-efficient way has revolutionized the way how  
2 we do genetic and population genetic research. Annotated, high-quality reference genomes are a  
3 cornerstone for resequencing surveys which aim to study the genetic variation and demographic  
4 history of an entire species. Resequencing studies usually align the sequences of all studied in-  
5 dividuals to a linear haploid reference sequence originating from a single individual or a mosaic  
6 of several individuals. In each site, this haploid sequence will only represent a single allele out  
7 of the entire genetic variation of the species. An inherent consequence is some degree of bias to-  
8 wards the alleles present in that reference sequence (“reference bias”). Sequencing reads carrying  
9 an alternative allele will naturally have mismatches in the alignment to the reference genome and  
10 consequently have lower mapping scores than reads carrying the same allele as the reference. This  
11 effect increases with genetic distance from the reference genome, which is of particular interest  
12 when using a reference genome from a related species for mapping (Shapiro & Hofreiter, 2014;  
13 Gopalakrishnan *et al.*, 2017; Heintzman *et al.*, 2017). Generally, reference bias can influence vari-  
14 ant calling by missing alternative alleles or by wrongly calling heterozygous sites as homozygous  
15 reference (Ros-Freixedes *et al.*, 2018) which is known to influence estimates of heterozygosity and  
16 allele frequencies (Chen *et al.*, 2012; Bryc *et al.*, 2013; Brandt *et al.*, 2015).

17 The field of palaeogenomics and the population genomic analysis of DNA obtained from hominin  
18 remains has led to a number of important insights and groundbreaking results in recent years,

including admixture between different hominin groups, migrations of prehistoric humans and the evolution of different phenotypes (Günther & Jakobsson, 2016; Slatkin & Racimo, 2016; Nielsen *et al.*, 2017; Dannemann & Racimo, 2018; Lazaridis, 2018; Skoglund & Mathieson, 2018). DNA preservation poses a major challenge for these studies, as fragmentation causes most authentic sequences to be shorter than 100 bp, and deamination damage increases the number of mismatches and can even mimic genetic variation at transition sites (Hofreiter *et al.*, 2001; Brotherton *et al.*, 2007; Briggs *et al.*, 2007).

In addition to fragmentation and other post-mortem damages, low coverage data is a major limiting factor for ancient DNA studies. Coverages below 1x rarely permit calling diploid genotypes so a very common approach is to use “pseudo-haploid” data: at each known single nucleotide polymorphisms (SNP) site one sequencing read is picked at random (or following a majority rule) in order to represent a haploid genotype of that individual. This approach would not introduce bias if the reads were a random representation of the chromosomes carried by the individual. Reference bias, however, would introduce some skew towards the reference allele at heterozygous sites. These characteristics of ancient DNA and practices used in palaeogenomic studies make them particularly vulnerable to reference bias (Prüfer *et al.*, 2010; Schubert *et al.*, 2012). It has been shown that pseudo-haploid data can be more biased than imputed genotypes (Martiniano *et al.*, 2017), and that reference bias and fragment length artifacts can interfere with phylogenetic classifications (Heintzman *et al.*, 2017). Reference bias can influence downstream analyses if these are based on estimating allele frequencies in a population, or studying pairwise allele sharing between individuals and groups.

This study investigates the presence and impact of reference bias in studies of prehistoric human populations using genomic ancient DNA. We first illustrate its abundance in published data from ancient human and archaic hominins, and illustrate how it is influenced by standard data processing. We then show how reference bias can influence some basic population genetic analyses such as population affinities and heterozygosity. Finally, we discuss some possible data filtering strategies in order to mitigate reference bias in ancient DNA studies.

## Results

### Mapping quality filtering

We first investigate whether reference bias is present in published ancient DNA data. We restrict our analysis to known SNPs, as most population genomic analyses are using SNPs and the allele frequencies at those positions. In particular, we are only using transversion polymorphisms (to avoid the effect of post-mortem deaminations) and sites identified to be polymorphic in a world-wide set of modern human populations (Mallick *et al.*, 2016). We investigate supposedly heterozygous sites (defined as sites covered by at least 10 reads with at least 25% representing the minor allele) in a set of published medium to high coverage human and hominin genomes (Table 1). We note that our approach does not include any rescaling of base qualities, as such approaches usually take the reference allele into account which may amplify reference bias.

At a heterozygous site, a DNA extract of an individual should contain the same number of reference and alternative fragments. We observe that after mapping to the human reference genome the average proportion of alternative alleles is lower than the expected 50 percent for all of the anatomically modern humans investigated (Figure 1), regardless of whether they represent SNP capture data, damage repaired libraries or standard shotgun sequencing (Table 1). As sequence fragments carrying the alternative allele will show an elevated number of mismatches to the reference genome, mapping quality seems a natural filter to avoid reference bias. Consistent with this expectation, we see a slightly stronger reference bias for stricter mapping quality filters. Lowering the mapping quality cutoff can have other detrimental effects, however, for example an enrichment of microbial contamination (Renaud *et al.*, 2017) or sequences not uniquely mapping to a particular region of the genome. This is somewhat illustrated by the archaic genomes, two Neandertals and a Denisovan, which show - on average - a bias towards the alternative allele when no mapping quality filter is employed (Figure 1). This suggests that these more distant taxa carry variation in the genome which is not captured by the reference genome based on anatomically modern humans, in turn causing fragments originating in other parts of the genome to map at the investigated sites. As the qualities of the base calls have not been rescaled after mapping to the reference genome, we do not see an effect of different minimum base quality thresholds on reference bias (Supplementary

Table 1: Information on the published medium to high coverage palaeogenomic and archaeogenomic data used in this study.

| Sample ID         | (Partial) UDG treatment <sup>§</sup> | SNP capture | Average sequencing depth <sup>†</sup> | Reference                         |
|-------------------|--------------------------------------|-------------|---------------------------------------|-----------------------------------|
| Stuttgart         | X                                    |             | 15.8x                                 | (Lazaridis <i>et al.</i> , 2014)  |
| Loschbour         | X                                    |             | 17.7x                                 | (Lazaridis <i>et al.</i> , 2014)  |
| Ust-Ishim         | X                                    |             | 29.9x                                 | (Fu <i>et al.</i> , 2014)         |
| sf12              | X                                    |             | 64.7x                                 | (Günther <i>et al.</i> , 2018)    |
| baa001            | X                                    |             | 13.2x                                 | (Schlebusch <i>et al.</i> , 2017) |
| Kotias            |                                      |             | 12.5x                                 | (Jones <i>et al.</i> , 2015)      |
| Bichon            |                                      |             | 15.4x                                 | (Jones <i>et al.</i> , 2015)      |
| ne1               |                                      |             | 18.5x                                 | (Gamba <i>et al.</i> , 2014)      |
| br2               |                                      |             | 15.4x                                 | (Gamba <i>et al.</i> , 2014)      |
| atp016            |                                      |             | 14.1x                                 | (Valdiosera <i>et al.</i> , 2018) |
| Rathlin1          |                                      |             | 10.9x                                 | (Cassidy <i>et al.</i> , 2015)    |
| Ballynahatty      |                                      |             | 10.7x                                 | (Cassidy <i>et al.</i> , 2015)    |
| I0054             | X                                    | X           | 2.4x                                  | (Mathieson <i>et al.</i> , 2015)  |
| I0103             | X                                    | X           | 2.4x                                  | (Mathieson <i>et al.</i> , 2015)  |
| I0118             | X                                    | X           | 1.7x                                  | (Mathieson <i>et al.</i> , 2015)  |
| I0172             | X                                    | X           | 3.4x                                  | (Mathieson <i>et al.</i> , 2015)  |
| I0408             | X                                    | X           | 1.7x                                  | (Mathieson <i>et al.</i> , 2015)  |
| I0412             | X                                    | X           | 1.9x                                  | (Mathieson <i>et al.</i> , 2015)  |
| I0585             | X                                    | X           | 2.4x                                  | (Mathieson <i>et al.</i> , 2015)  |
| AltaiNeandertal   | X                                    |             | 45.2x                                 | (Prüfer <i>et al.</i> , 2014)     |
| VindijaNeandertal | X                                    |             | 25.9x                                 | (Prüfer <i>et al.</i> , 2017)     |
| Denisovan         | X                                    |             | 26.7x                                 | (Meyer <i>et al.</i> , 2012)      |

<sup>§</sup> Enzymatic repair of deamination damages

<sup>†</sup> at analyzed SGDP SNPs, using a minimum mapping quality of 30

Figure 1).

Investigating pairwise correlations between the proportion of alternative alleles at sites considered heterozygous in both individuals shows significantly positive correlations in most cases (Supplementary Table 1). This indicates that the strength of reference (and alternative) bias may differ regionally across the genome, so there could be an effect of sequence context and uniqueness of the specific sequences across the genome. The highest correlations are observed between samples from the same study or produced by the same institute suggesting that similar wet lab techniques also influence this effect.

## Distribution of bias

To investigate the distribution of reference bias instead of just averages as above, we modified original reads to carry opposite alleles at each SNP site and remapped them. We created a virtual read set for the Scandinavian Mesolithic hunter-gatherer sf12 (Günther *et al.*, 2018) containing reads for all SNPs identified with mapping quality and base quality of at least 30 in the original mapping. No filter was placed on coverage, a SNP was included even if it was only covered by a single read. This joint read set of original and modified reads thus had perfectly balanced allele ratios for all SNPs. The full set was remapped, and SNPs were grouped based on the observed alternative allele fraction among all reads that again mapped to their respective SNPs with mapping quality of at least 30.

In total, 1,157,266 SNPs were analyzed. Out of these, 1,088,802 (94.08%) showed perfect allelic balance, with a proportion of alternative alleles of 0.5. About 100 SNPs were also affected by reads that mapped back with sufficient quality, but to a different genomic location. In these results, we only present proportions based on reads that map back to their original location from the first mapping round. The proportion of alternative alleles is summarized in Table 2. Notably, there is a subset of SNPs showing alternative, as opposed to reference, bias, and also a subset of SNPs where the bias is total, i.e. only one of the two alleles is ever mapped back successfully (within this

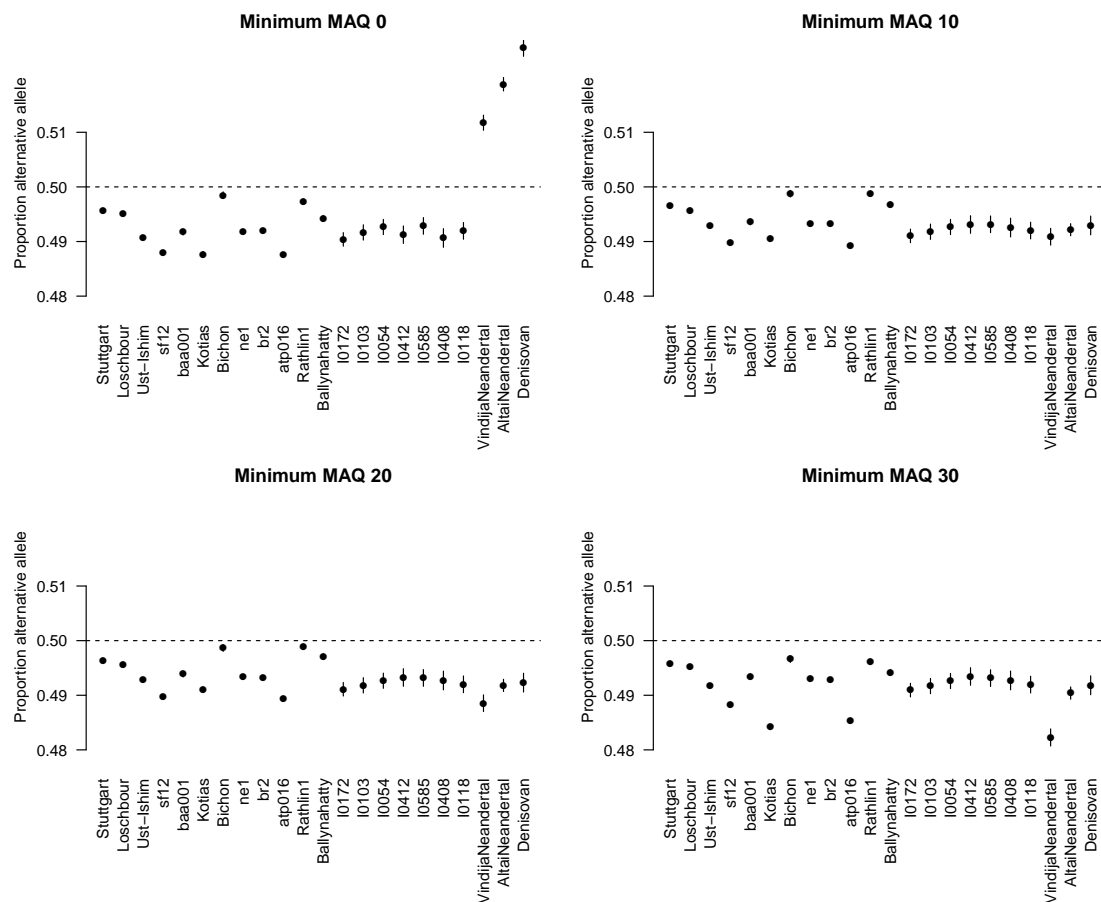

Figure 1: Reference bias in published genome-wide ancient DNA datasets for different minimum mapping quality thresholds. The plots show the average proportion of reads at heterozygous transversion sites (see Methods) representing the alternative allele. Error bars indicate two standard errors of the mean.

99 dataset). The distribution across the genome of sites deviating from the balanced case is similar  
100 to the overall density of the SNPs used. Generally, all chromosomes and chromosomal regions are  
101 affected.

Table 2: Proportion of alternative alleles when mapping back original reads and virtual opposite allele reads for the sf12 individual.

| Proportion of alternative alleles | # SNPs  | Percentage |
|-----------------------------------|---------|------------|
| 0                                 | 11497   | 0.99%      |
| (0, 0.4)                          | 12962   | 1.12%      |
| [0.4, 0.5)                        | 37262   | 3.22%      |
| 0.5                               | 1088802 | 94.08%     |
| (0.5, 0.6]                        | 4172    | 0.36%      |
| (0.6, 1)                          | 1413    | 0.12%      |
| 1                                 | 1158    | 0.10%      |

## 102 The influence of fragment length

103 Most mapping strategies set the number of allowed mismatches relative to the length of the se-  
104 quenced fragment. Therefore, shorter fragments might show a stronger reference bias than long  
105 fragments. To investigate this, we used the 57x genome generated for the Scandinavian Mesolithic  
106 hunter-gatherer sf12 (Günther *et al.*, 2018) and partitioned the data into fragment length bins.  
107 The large amount of data allows us to still have a sufficient number of SNPs covered at 10x or

more for each of the length bins.

Somewhat expectedly, shorter fragments display a stronger reference bias than longer sequences (Figure 2A). Generally, fragment length might be a main driver of reference bias across all samples as the mode of each individual's fragment size distribution is highly correlated with the average proportion of alternative alleles at heterozygous sites (Pearson's  $r = 0.67$ ,  $p = 0.0006$ ; Figure 2B). This also has an effect on the proportion of sites considered heterozygous among all sites analyzed which can be seen as a relative measure for the individual's heterozygosity (Figure 2C). In fact, different fragment length bins of the same individual produce heterozygosity estimates that do not overlap in their 95% confidence interval (Figure 2C). This represents a general limitation for estimating heterozygosity from ancient DNA data which may to some degree explain the generally low diversity estimates for many prehistoric groups (e.g. Skoglund *et al.*, 2014; Kousathanas *et al.*, 2017; Scheib *et al.*, 2018). The potential of obtaining significantly different estimates for the same population genetic statistic may also have enormous effects on other downstream analyses such as population affinities and population structure.

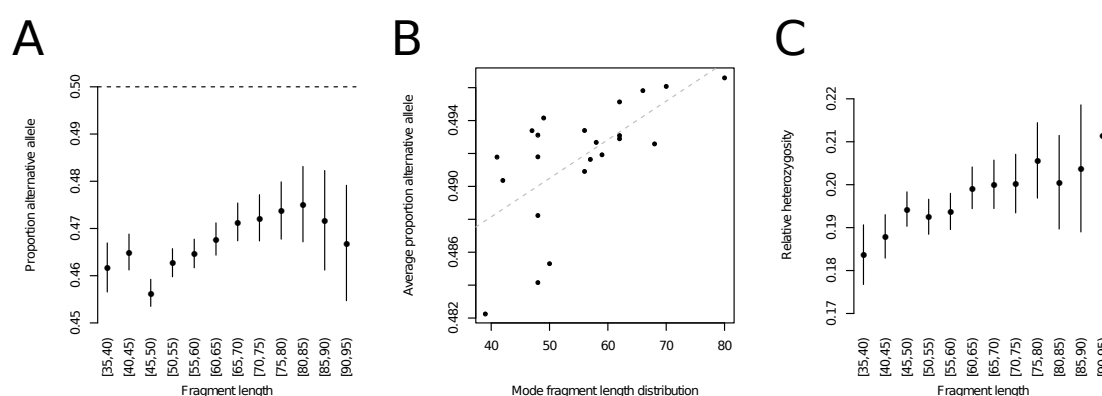

Figure 2: Connection between fragment length and reference bias. (A) Proportion of alternative allele for different fragment length bins in the high coverage individual sf12. (B) Correlation between average proportion of alternative alleles and the mode of the fragment size distribution across all investigated individuals. (C) Proportion of heterozygous sites among all sites with sufficient coverage for different fragment length bins in the high coverage individual sf12. All error bars indicate two standard errors.

## Impact on measures of population affinity

In order to investigate the influence of reference bias on population affinities, we calculated different combinations of  $D$  statistics of the form  $D(\text{Chimp}, X; Y, Z)$ , where  $X$  is a modern human population, and  $Y$  and  $Z$  are two different treatments of the same individual sf12. Therefore, the expectation for  $D$  is 0, but differences in reference bias between  $Y$  and  $Z$  could lead to spurious allele sharing between population  $X$  and a deviation from 0. Negative values of  $D$  indicate more allele sharing of  $X$  with  $Y$  while positive values indicate an excess of shared alleles between  $X$  and  $Z$ . The populations  $X$  were grouped by continental origin and we calculated the statistics separately for whole genome shotgun data (SGDP, Mallick *et al.*, 2016) and genotyped populations (HO, Lazaridis *et al.*, 2014).

We use four different versions of genotypes for sf12. First, we compare pseudo-haploid calls (random allele per site with minimum mapping and base quality of 30) to diploid genotype calls (Figure 3A and C). This comparison assumes that the diploid calls are less affected by reference bias as slight deviations from a 50/50-ratio at heterozygous sites should be tolerated by a diploid genotype caller but random sampling would be biased towards the reference allele. This is supported by the  $D$  statistic  $D(\text{chimp}, \text{reference}; \text{sf12\_hapl}, \text{sf12\_dipl}) < 0$  ( $Z = -13.5$ ), indicating more allele sharing between the reference and the pseudo-haploid calls. For this illustration, we are using diploid genotype calls from *GATK* as we are only looking at the variation at known SNP sites. We note that genotype callers specifically developed for ancient DNA (Link *et al.*, 2017; Zhou *et al.*, 2017; Prüfer, 2018) are preferable when calling novel variants from ancient DNA data as they incorporate post-mortem damage and other ancient DNA specific properties. Second, we

compare randomly sampled reads of different fragment length categories (Figure 3B and D) as longer (75-80 bp) fragments should exhibit less reference bias than short (35-40 bp) fragments (see above), which is supported by the  $D$  statistic  $D(\text{chimp}, \text{reference}; \text{sf12\_short}, \text{sf12\_long}) < 0$  ( $Z = -20.6$ ), indicating more allele sharing between the reference and pseudo-haploid calls from short fragments.

In general, we observe a deviation from zero in most cases highlighting the effect of reference bias on these statistics (Figure 3). Surprisingly, the directions of this bias differ between the HO data and the SGDP data, which suggests that different reference data sets are also affected by reference bias at different degrees. This represents a potential batch effect which also needs to be considered when merging different reference data sets. Affinities to populations of different geographic origin vary in their sensitivity to reference bias but little general trends are observable. Western Eurasian populations show a strong deviation from 0 in all tests. Notably, African populations show the strongest deviation in the short versus long comparison in the SGDP data set while they exhibit almost no bias in the same comparison using the HO data. As the biases do not seem to show a consistent tendency, we cannot directly conclude that recent ancient DNA papers have been systematically biased in some direction. The shifts appear to be dataset and test specific so some results could still be driven by spurious affinities due to reference bias.

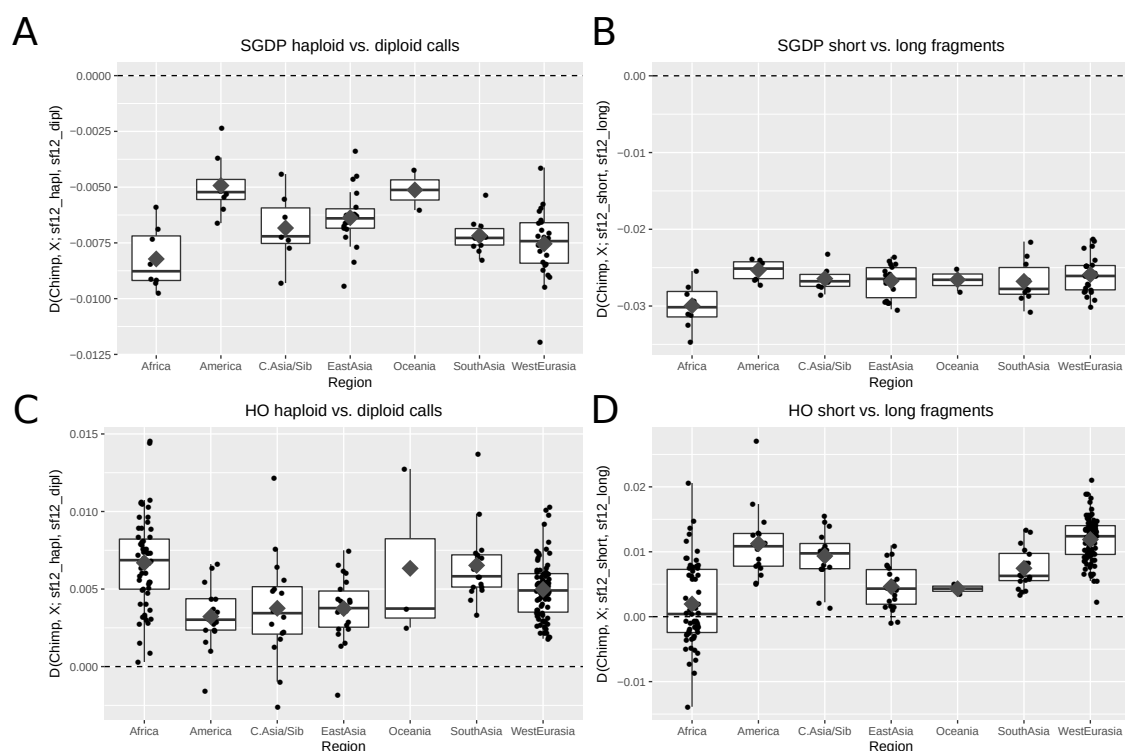

Figure 3:  $D$  statistics testing the affinity between different modern populations ( $X$ ) and two different treatments of the high coverage individual sf12. The basis for these comparisons are the modern sequence data of the SGDP panel (A and B) or genotype data from the HO panel (C and D). Comparisons are done between pseudo-haploid and diploid calls for sf12 (A and C), and between pseudo-haploid calls from short (35-40 bp) or long (75-80 bp) fragments (B and D). The x axis represents the geographic origin of population  $X$ , diamonds show the mean for each continental group.

The human reference genome sequence is a mosaic of the genomes of different individuals. The geographic origin of the specific segments should have an impact on the population genetic affinities as the reference allele will more likely be found in specific geographic regions. We obtained information on the local ancestry of the human reference genome from Green *et al.* (2010). According to this estimate 15.6 % of the reference genome can be assigned to African, 5.0 % to East Asian and 30.0 % to European origin while the origin for 49.4 % is uncertain. We re-calculate  $D$  statistics for the different parts of the genome separately, restricting the analysis to the SGDP data. The impact of reference bias differs between the different ancestries (Figure 4). Generally,

reference bias is weakest for reference segments of African origin. Notably, African populations show the strongest deviations from 0 in this case. Sequences mapping to the European segments of the reference show a strong reference bias with slight differences between continental populations. Reference bias at the East Asian segments of the reference genome seems intermediate but the  $D$  statistics also show large variation which may be due to the only small proportion of the reference genome that could confidently be assigned to an East Asian origin (Green *et al.*, 2010).

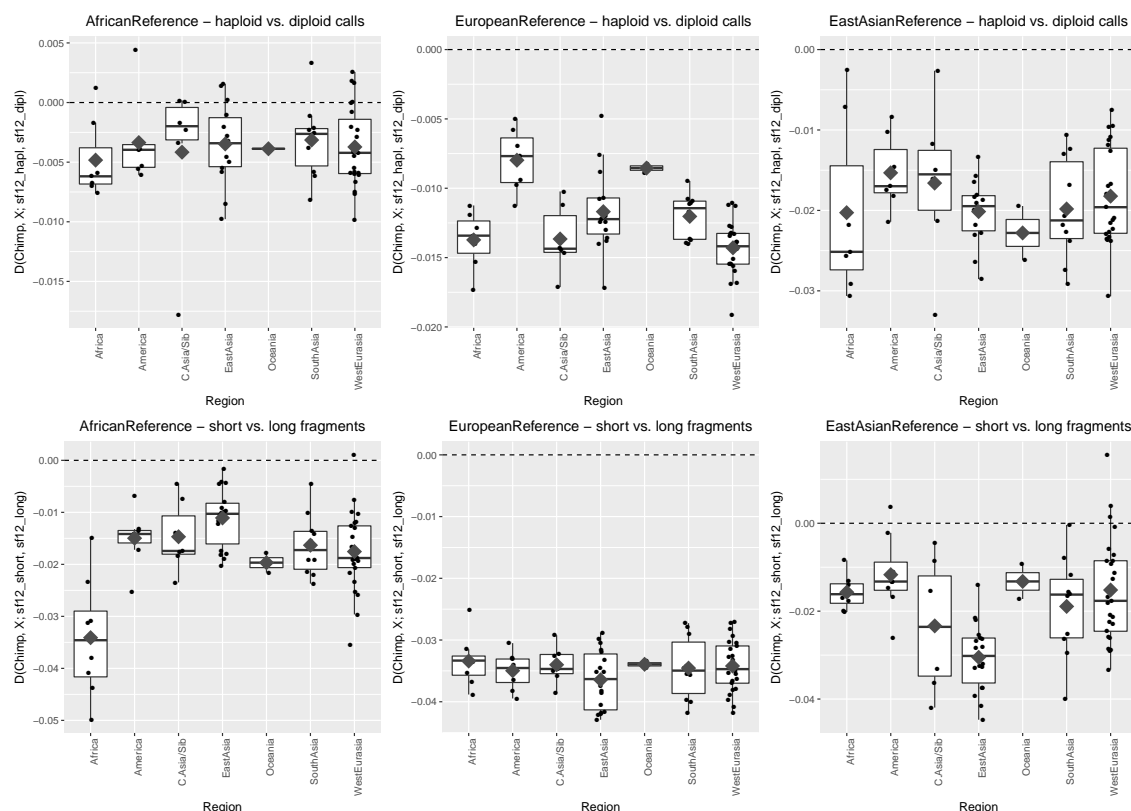

Figure 4:  $D$  statistics similar to Figure 3 for different parts of the reference genome depending on their geographic origin (Green *et al.*, 2010). The x axis represents the geographic origin of population  $X$ , diamonds show the mean for each continental group.

Finally, we explore whether reference bias can affect estimates of archaic ancestry. We estimate the Neandertal ancestry proportion in sf12 as done by Prüfer *et al.* (2017):

$$\alpha = \frac{f_4(sf12, Mbuti; AltaiNea, Chimp)}{f_4(VindijaNea, Mbuti; AltaiNea, Chimp)}$$

We use eight different combinations of diploid and pseudo-haploid calls for sf12 as well as the two Neandertals in this statistic (Table 3). The 95% confidence intervals of all estimates overlap but point estimates differ by up to 1.25% when using all pseudo-haploid versus all diploid calls. The African segments of the reference genome yield the lowest point estimates (as low as 1.42%) – some of these estimates are not even significantly different from 0. These differences highlight some of the sensitivities of  $f_4$ -ratios not just to the choice of reference populations (Petr *et al.*, 2018) but also to technical artifacts.

## Potential data filtering strategies

After establishing the abundance and potential effect of reference bias, we investigated two simple post-mapping filtering approaches to mitigate reference bias. The two agents involved in the process are the reference genome and the sequence fragments or reads. We investigated 1,407,340 of the SGDP transversion set of sites with at least 200 bp distance between two neighboring SNPs. First, we modified reads that successfully mapped to a SNP site with a match of the reference allele to carry the alternative allele. These modified reads were re-mapped to the reference genome

Table 3: Percentage of Neandertal ancestry (and standard errors) in sf12 using diploid and pseudo-haploid calls and different subsets of the human reference genome. Parts of the genome of East Asian origin were excluded due to their small total size.

| Statistic <sup>§</sup>                        | Full reference  | European Reference | African Reference |
|-----------------------------------------------|-----------------|--------------------|-------------------|
| $f_4(sf12_h, Mbuti; AltaiNea_h, Chimp)$       | $3.15 \pm 0.44$ | $3.11 \pm 0.80$    | $2.47 \pm 1.01$   |
| $f_4(VindijaNea_h, Mbuti; AltaiNea_h, Chimp)$ |                 |                    |                   |
| $f_4(sf12_h, Mbuti; AltaiNea_d, Chimp)$       | $2.54 \pm 0.44$ | $2.70 \pm 0.80$    | $1.91 \pm 1.01$   |
| $f_4(VindijaNea_h, Mbuti; AltaiNea_d, Chimp)$ |                 |                    |                   |
| $f_4(sf12_d, Mbuti; AltaiNea_h, Chimp)$       | $2.22 \pm 0.43$ | $2.76 \pm 0.77$    | $1.91 \pm 0.98$   |
| $f_4(VindijaNea_h, Mbuti; AltaiNea_h, Chimp)$ |                 |                    |                   |
| $f_4(sf12_d, Mbuti; AltaiNea_d, Chimp)$       | $2.79 \pm 0.43$ | $2.32 \pm 0.76$    | $1.42 \pm 0.98$   |
| $f_4(VindijaNea_h, Mbuti; AltaiNea_d, Chimp)$ |                 |                    |                   |
| $f_4(sf12_h, Mbuti; AltaiNea_h, Chimp)$       | $2.68 \pm 0.45$ | $2.43 \pm 0.80$    | $2.59 \pm 1.01$   |
| $f_4(VindijaNea_d, Mbuti; AltaiNea_h, Chimp)$ |                 |                    |                   |
| $f_4(sf12_h, Mbuti; AltaiNea_d, Chimp)$       | $2.10 \pm 0.44$ | $2.07 \pm 0.79$    | $2.03 \pm 1.00$   |
| $f_4(VindijaNea_d, Mbuti; AltaiNea_d, Chimp)$ |                 |                    |                   |
| $f_4(sf12_d, Mbuti; AltaiNea_h, Chimp)$       | $2.45 \pm 0.44$ | $2.22 \pm 0.77$    | $2.12 \pm 0.97$   |
| $f_4(VindijaNea_d, Mbuti; AltaiNea_h, Chimp)$ |                 |                    |                   |
| $f_4(sf12_d, Mbuti; AltaiNea_d, Chimp)$       | $1.90 \pm 0.44$ | $1.81 \pm 0.76$    | $1.63 \pm 0.97$   |
| $f_4(VindijaNea_d, Mbuti; AltaiNea_d, Chimp)$ |                 |                    |                   |

<sup>§</sup>  $d$  and  $h$  denote diploid and pseudo haploid-calls, respectively

and they passed the filtering if they still mapped to the same position of the genome with no indels. Second, we prepared a modified version of the reference genome which carried a third base (neither the reference base nor the known alternative allele) at all 1,407,340 sites. A similar approach has been used to study ultra-short fragments in sequence data from archaic hominins (de Filippo *et al.*, 2018). All reads originally mapping to the SNP sites were re-mapped to this modified reference genome, and again only reads that mapped to the same location and without indels passed the filtering. Finally, we combined both filters. All scripts used for filtering can be found at <https://bitbucket.org/tguenther/refbias/>

The filtering approaches increase the average proportion of the alternative allele at homozygous sites (Figure 5A). Mapping to a modified reference genome shows a slightly better improvement than using modified reads, while combining both yields the best results in most cases. A small number of samples shows a 50/50-ratio after filtering but most are still significantly below that ratio. This is not surprising as the filtering is only applied to reads that have previously mapped to a single reference genome so the data before filtering does not represent a 50/50-ratio, and removing some reference allele reads cannot completely account for the non-reference reads lost earlier. This is most evident in the data from Mathieson *et al.* (2015) which was only available as mapped reads after running *bwa* (Li & Durbin, 2009) with lower maximum edit distance parameters (-n 0.04) than our pipeline which does not leave much room for improvement after filtering. Another possible reason for deviation from a 50/50-ratio at heterozygous sites could be low levels of modern contamination which may lead to a slight over-representation of the reference allele before mapping (Prüfer *et al.*, 2014; Racimo *et al.*, 2016; Prüfer, 2018). Comparing the outcome of the filters to different fragment length categories shows a similar pattern: the bias is decreased but some length categories still display differences in their relative heterozygosity (Figure 5B).

## Discussion

Systematic biases are problematic in all types of quantitative research, and it is therefore important to be aware of them and alleviate or avoid their effects as much as possible. Different systematic biases in next-generation sequencing data have been investigated before (Prüfer *et al.*, 2010; Ross *et al.*, 2013), and it is known parameters such as sequencing depth can influence population genomic estimates (Crawford & Lazzaro, 2012; Fumagalli, 2013; Korneliussen *et al.*, 2013). Differences in sequencing strategies (e.g. read length) and bioinformatic processing have been shown to generate batch effects and dramatically affect downstream analyses (Leek *et al.*, 2010; Leigh *et al.*, 2018; Shafer *et al.*, 2016; Mafessoni *et al.*, 2018). Another well known bias in population genetics is ascertainment bias which arises when the studied variants were ascertained in selected populations only, and can substantially impact measurements of heterozygosity and related methods (Albrechtsen *et al.*, 2010). The research community is aware of these potential issues and they are avoided by filtering strategies, standardizing bioinformatic pipelines, including controls and accounting for systematic biases in downstream analysis.

The common use of randomly sampled alleles and pseudo-haploid data in palaeogenomic re-

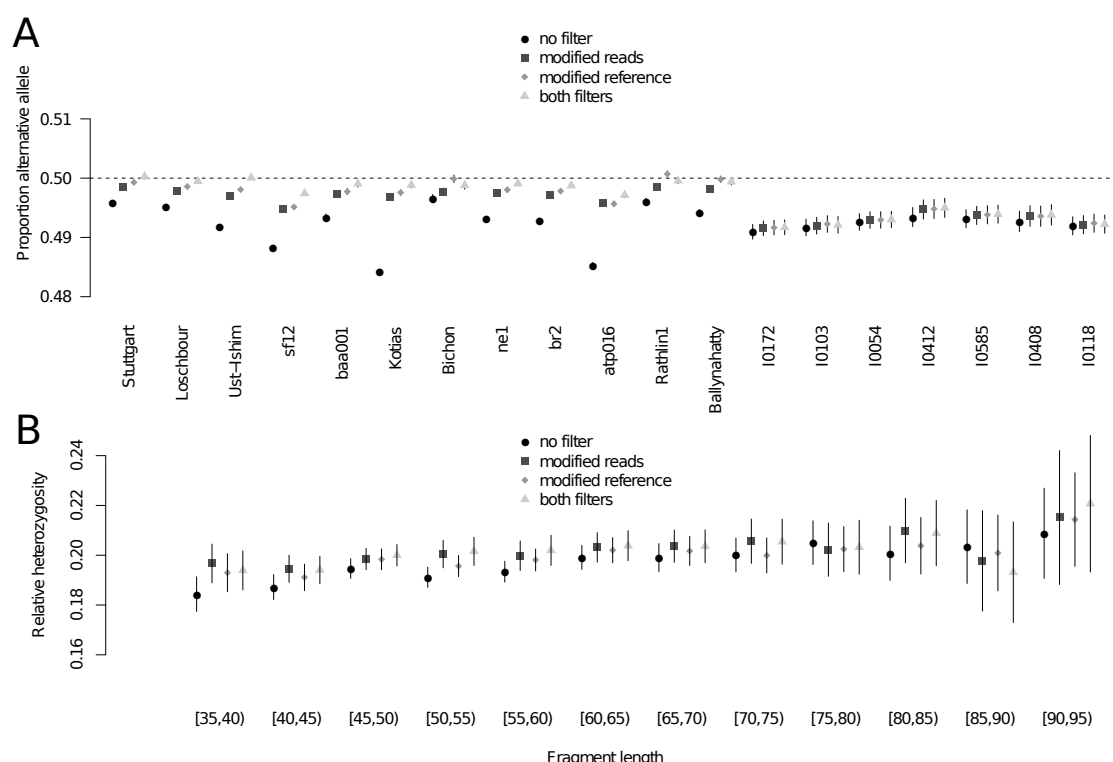

Figure 5: Comparison of different post-mapping filtering strategies for high coverage bam files from anatomically modern humans employing mapping and base quality filters of 30. (A) Average proportion of the alternative allele for the comparison between no additional filters (see also Figure 1), remapping of reads carrying the reference allele modified to carry the alternative allele (modified reads), remapping against a modified reference carrying a third allele at the SNP sites, and both filters together. (B) Influence of filtering on measures of heterozygosity for different fragment sizes in sf12. Error bars indicate two standard errors.

search can exacerbate the effect of reference bias compared to diploid genotype calls obtained from medium to high coverage data. We show that reference bias is able to lead to significant differences between estimates of population genetic parameters (heterozygosity), overestimated levels of archaic ancestry as well as to cause spurious affinities to certain populations. Mixing different mapping parameters or minimum fragment lengths in the same study should generally be avoided. Additionally, strong differences of fragment size distributions between different individuals may cause spurious affinities due to reference bias. Many estimates from low coverage data are generally noisy, but studies show increasing sample sizes and amounts of data which means that subtle biases become of increasing importance in the future. Notably, the bias for the whole genome (Figure 3) seems less extreme than some of the results for ancestry-specific segments (Figure 4) suggesting that the mosaic nature of the human reference genome may reduce the bias to some degree as different regions will be biased in different directions. In this respect the human reference genome is different from many other species where the reference genome is derived from a single individual which would increase the potential impact of reference bias on population genetic analysis in other systems.

Our analysis does not directly indicate a strong direct impact of different wet lab procedures on the observed average degree of reference bias. We caution, however, that such an effect may exist as indicated by the correlations between samples processed in the same lab (Supplementary Table 1). Different library preparation techniques produce different length distributions since some approaches are directly targeting shorter fragments which will have an impact on mapping. Furthermore, the SNP capture approaches used to generate the data we analyzed uses one bait per allele minimizing reference bias before sequencing. Most whole genome or exome capture approaches, however, are using baits designed from a single individual which should introduce a pre-mapping bias towards the allele carried by that person (Quail *et al.*, 2008; Heinrich *et al.*, 2012; Meynert *et al.*, 2013; Lindo *et al.*, 2016). Finally, contamination from another person should tend

to introduce the major allele which is likely the reference allele in most cases – a process that will also increase reference bias before mapping (Prüfer *et al.*, 2014; Racimo *et al.*, 2016; Prüfer, 2018).

Our analysis of the distribution of reference bias across the genome for the sf12 individual has several repercussions. First, most reads are neutral to changing the allele to its opposing counterpart. This leads to a possible alternative filtering strategy. In cases where a pre-defined set of variants is acceptable, a quality control should be performed on the study level to filter out SNPs which correspond to reads that do not survive this alternative mapping. The exact details of such a filter will, again, be dependent on the expected length and degradation of the reads. Another important observation is that reference bias does not operate alone. There is also a weaker, but very clear, signal of alternative allele bias, affecting roughly 0.6% of the total SNPs. In addition, both reference and alternative bias can sometimes be very strong on the level of individual SNPs. Even in a dataset with an overall proportion of alternative reads close to 0.5 in heterozygous sites overall, subsets of SNPs might perform very differently, again possibly confusing deeper forms of analysis that do not only consider genome-wide metrics – for example selection scans or analysis of loci involved in certain traits.

We show, that filtering steps can reduce but not completely eliminate reference bias at SNPs after mapping. To fully prevent reference bias, alternative mapping strategies would be needed or filtering strategies would have to be developed for all raw data which is not always published. Furthermore, these proposed filters require a pre-defined set of variants used for downstream analysis and are not suitable for calling novel variants from ancient DNA data. The latter, however, will generally be only restricted to high quality and high coverage samples. A recently developed genotype caller for ancient DNA data estimates reference bias from the data and uses the estimate as a parameter for variant calling (Prüfer, 2018), which seems to work well for samples sequenced to coverages of 15x or higher. One could use the filtering steps tested by us in a similar manner to estimate what proportion of reads in a library are affected by reference bias which could later be used to estimate genotype likelihoods (Nielsen *et al.*, 2011; Wang *et al.*, 2013). As reference bias is somewhat predictable and detectable, this offers opportunities to account for it in downstream analyses (e.g. Bryc *et al.*, 2013; Wu *et al.*, 2017).

Alternative mapping strategies such as mapping against genome graphs (Paten *et al.*, 2017; Garrison *et al.*, 2018) or multiple reference genomes simultaneously (Schneeberger *et al.*, 2009) could be able to eliminate reference bias already in the mapping step. These approaches are not broadly established in human genomics yet but their development has huge potential with regard to reference bias. Such approaches could also lead to an increase in the total amount of authentic data that can be obtained from a library while post-mapping filters will reduce the amount of data used for downstream analyses (between 2 and 10 % in our cases). In addition to filtering data and standardizing bioinformatic pipelines for all samples used in a study (both published data and newly sequenced), we propose simulations as a potential control. Specific ancient DNA simulation suites (Renaud *et al.*, 2017) provide the opportunity to simulate data exactly matching fragment size and damage patterns of empirical ancient DNA data so one can use them to study if observed patterns may be driven by reference bias alone.

The present study focused mainly on humans but the effect of reference bias extends to other species as well. The slight alternative bias in archaic hominins and the different population affinities depending on the geographic origin of the reference genome illustrate that increasing evolutionary distance can exacerbate reference bias or even cause systematic alternative bias at some sites. This suggests that mapping against a reference genome of a related species (in the absence of a reference genome for the species in focus) may impact downstream analyses as well (Green *et al.*, 2010; Schubert *et al.*, 2012; Shapiro & Hofreiter, 2014; Gopalakrishnan *et al.*, 2017), but the population genetic bias may be weaker as the reference genome employed usually represents an outgroup of equal distance to all individuals in the studied species.

## Conclusion

Our analysis highlights that reference bias is pervasive in ancient DNA data used to study pre-historic populations. While the strength of the effect differs between applications and data set, it is clear that reference bias has the potential to create spurious results in population genomic analyses. Furthermore, even when the overall presence of bias is limited, it is important to assess whether subsets of variants are prone to strong systematic bias, including the possible presence of alternative bias.

We are entering a time where sample sizes in ancient DNA studies reach one hundred and beyond, while the questions focus on more and more detailed patterns and subtle differences. At the same time, sampling starts to involve older remains and remains from more challenging environments – both of which are usually associated with poor preservation and shorter fragments. Therefore it seems crucial to avoid reference bias or other biases such as batch effects or ascertainment biases as much as possible, and to develop and apply computational strategies to mitigate the impact of these issues.

## Materials and Methods

### Data sets and bioinformatic processing

We selected medium to high coverage data from 22 different individuals representing data generated by different research groups with different wet lab strategies, covering different geographic regions and time periods (Table 1). For anatomically modern human samples, we tried to use data as raw as possible but some publications only provided the data after mapping and filtering. The general pipeline for these samples was identical to previous studies (Günther *et al.*, 2015, 2018). Reads were mapped to the 1000 genomes version of the human reference genome hg19 using *bwa* (Li & Durbin, 2009) with non-default parameters -l 16500 -n 0.01 -o 2. Subsequently, PCR duplicates and fragments shorter than 35 bp were filtered (Kircher, 2012).

We restricted our analysis to a set of known transversion variants to avoid an effect of post-mortem damage. We selected 107,404 transversions from the Human Origins panel (Patterson *et al.*, 2012; Lazaridis *et al.*, 2014) as well as 1,693,337 transversions which were at at least 5% allele frequency in the public data of the Simons Genome Diversity Project (SGDP, Mallick *et al.*, 2016). To detect reference bias, we are looking at supposedly heterozygous sites where one would expect reads to map in a 50/50-ratio on average if no bias existed. We define a heterozygous site as a SNP for which we observe at least ten reads with between 25 to 75% of those representing the alternative allele. These reads are assessed using *samtools mpileup* (version 1.5, Li *et al.*, 2009) employing the -B option to turn off base quality rescaling.

For the high coverage genome of sf12 (Günther *et al.*, 2018) as well as the high coverage archaic genomes (Meyer *et al.*, 2012; Prüfer *et al.*, 2014, 2017) we also generated diploid genotype calls following the pipeline described in Günther *et al.* (2018). Briefly, base qualities of all Ts in the first five base pairs of each read as well as all As in the last five base pairs were set to 2. *Picard* version 1.118 (Broad Institute, 2016) was used to add read groups to the files followed by indel realignment with *GATK* 3.5.0 (McKenna *et al.*, 2010) based on reference indels identified in phase 1 of the 1000 genomes project (Auton *et al.*, 2015). Finally, diploid genotypes were called with *GATK*'s UnifiedGenotyper employing the parameters -stand\_call\_conf 50.0, -stand\_emit\_conf 50.0, -mbq 30, -contamination 0.02 and -output\_mode EMIT\_ALL\_SITES using dbSNP version 142 as known SNPs. Genotype calls not flagged as low quality calls at investigated SNP sites were extracted from the VCF files using *vcftools* (Danecek *et al.*, 2011).

### Population genetic tests

In order to investigate the population genetic effect of reference bias, we calculated  $D$  and  $f$  statistics (Patterson *et al.*, 2012). These statistics are based on pairwise allele sharing, so they should be sensitive to spurious allele sharing due to reference bias.  $D$  statistics were calculated with *popstats* (Skoglund *et al.*, 2015),  $f_4$  ratios were calculated *ADMIXTOOLS* (Patterson *et al.*, 2012), and standard errors were calculated employing a weighted block jackknife with a block size of 5 Mbp. We used the chimpanzee reference genome as an outgroup.

## Acknowledgements

We are grateful to Arielle Munters, Federico Sanchez, Mattias Jakobsson, and other members of the Human Evolution research program for discussions and comments as well as the attendees of various early presentations on this topic for their input and encouragement to turn it into a manuscript. We also thank Arielle Munters for initial data processing and Shop Mallick for sharing the local ancestry information for the human reference genome. The computations were performed on resources provided by SNIC through Uppsala Multidisciplinary Center for Advanced Computational Science

(UPPMAX) under projects sllstore2017087, uppstore2018139, SNIC 2018/8-106 and 2018/8-239. TG was supported by grants from the Swedish Research Council Vetenskapsrådet and The Royal Physiographic Society of Lund (Nilsson-Ehle Endowments), as well as a Knut och Alice Wallenbergs Stiftelse grant to Mattias Jakobsson. CN was supported by a grant from the Swedish Research Council for Environment, Agricultural Sciences and Spatial Planning (FORMAS).

## References

- Albrechtsen A, Nielsen FC, Nielsen R (2010) Ascertainment Biases in SNP Chips Affect Measures of Population Divergence. *Molecular Biology and Evolution*, **27**, 2534–2547.
- Auton A, Abecasis GR, Altshuler DM, *et al.* (2015) A global reference for human genetic variation. *Nature*, **526**, 68–74.
- Brandt DYC, Aguiar VRC, Bitarello BD, Nunes K, Goudet J, Meyer D (2015) Mapping Bias Overestimates Reference Allele Frequencies at the HLA Genes in the 1000 Genomes Project Phase I Data. *G3: Genes, Genomes, Genetics*, **5**, 931–941.
- Briggs AW, Stenzel U, Johnson PL, *et al.* (2007) Patterns of damage in genomic DNA sequences from a Neandertal. *Proceedings of the National Academy of Sciences*, **104**, 14616–14621.
- Broad Institute (2016) Picard tools. <https://broadinstitute.github.io/picard/>.
- Brotherton P, Endicott P, Sanchez JJ, *et al.* (2007) Novel high-resolution characterization of ancient DNA reveals C> U-type base modification events as the sole cause of post mortem miscoding lesions. *Nucleic acids research*, **35**, 5717–5728.
- Bryc K, Patterson NJ, Reich D (2013) A Novel Approach to Estimating Heterozygosity from Low-Coverage Genome Sequence. *Genetics*, S. genetics.113.154500.
- Cassidy LM, Martiniano R, Murphy EM, *et al.* (2015) Neolithic and Bronze Age migration to Ireland and establishment of the insular Atlantic genome. *Proceedings of the National Academy of Sciences*, S. 1–6.
- Chen X, Listman JB, Slack FJ, Gelernter J, Zhao H (2012) Biases and Errors on Allele Frequency Estimation and Disease Association Tests of Next-Generation Sequencing of Pooled Samples. *Genetic Epidemiology*, **36**, 549–560.
- Crawford JE, Lazzaro BP (2012) Assessing the accuracy and power of population genetic inference from low-pass next-generation sequencing data. *Frontiers in Genetics*, **3**, 66.
- Danecek P, Auton A, Abecasis G, *et al.* (2011) The variant call format and VCFtools. *Bioinformatics (Oxford, England)*, **27**, 2156–2158.
- Dannemann M, Racimo F (2018) Something old, something borrowed: admixture and adaptation in human evolution. *Current Opinion in Genetics & Development*, **53**, 1–8.
- de Filippo C, Meyer M, Prüfer K (2018) Quantifying and reducing spurious alignments for the analysis of ultra-short ancient DNA sequences. *BMC Biology*, **16**, 121.
- Fu Q, Li H, Moorjani P, *et al.* (2014) Genome sequence of a 45,000-year-old modern human from western Siberia. *Nature*, **514**, 445–449.
- Fumagalli M (2013) Assessing the Effect of Sequencing Depth and Sample Size in Population Genetics Inferences. *PLOS ONE*, **8**, e79667.
- Gamba C, Jones ER, Teasdale MD, *et al.* (2014) Genome flux and stasis in a five millennium transect of European prehistory. *Nature Communications*, **5**, 5257.
- Garrison E, Sirén J, Novak AM, *et al.* (2018) Variation graph toolkit improves read mapping by representing genetic variation in the reference. *Nature Biotechnology*.
- Gopalakrishnan S, Samaniego Castruita JA, Sinding MHS, *et al.* (2017) The wolf reference genome sequence (*Canis lupus lupus*) and its implications for *Canis* spp. population genomics. *BMC Genomics*, **18**, 495.

- 406 Green RE, Krause J, Briggs AW, *et al.* (2010) A draft sequence of the Neandertal genome. *Science*  
407 (*New York, N.Y.*), **328**, 710–22.
- 408 Günther T, Jakobsson M (2016) Genes mirror migrations and cultures in prehistoric Europe—a  
409 population genomic perspective. *Current Opinion in Genetics & Development*, **41**, 115–123.
- 410 Günther T, Malmström H, Svensson EM, *et al.* (2018) Population genomics of Mesolithic Scan-  
411 dinavia: Investigating early postglacial migration routes and high-latitude adaptation. *PLoS*  
412 *biology*, **16**, e2003703.
- 413 Günther T, Valdiosera C, Malmström H, *et al.* (2015) Ancient genomes link early farmers from  
414 Atapuerca in Spain to modern-day Basques. *Proceedings of the National Academy of Sciences*  
415 *of the United States of America*, **112**, 11917–11922.
- 416 Heinrich V, Stange J, Dickhaus T, *et al.* (2012) The allele distribution in next-generation sequencing  
417 data sets is accurately described as the result of a stochastic branching process. *Nucleic Acids*  
418 *Research*, **40**, 2426–2431.
- 419 Heintzman PD, Zazula GD, MacPhee RD, *et al.* (2017) A new genus of horse from Pleistocene  
420 North America. *eLife*, **6**.
- 421 Hofreiter M, Jaenicke V, Serre D, Haeseler Av, Pääbo S (2001) DNA sequences from multiple  
422 amplifications reveal artifacts induced by cytosine deamination in ancient DNA. *Nucleic acids*  
423 *research*, **29**, 4793–4799.
- 424 Jones ER, Gonzalez-Fortes G, Connell S, *et al.* (2015) Upper Palaeolithic genomes reveal deep  
425 roots of modern Eurasians. *Nature communications*, **6**, 8912.
- 426 Kircher M (2012) Analysis of high-throughput ancient DNA sequencing data. In *Methods in*  
427 *Molecular Biology (Clifton, N.J.)*, Bd. 840, S. 197–228.
- 428 Korneliussen TS, Moltke I, Albrechtsen A, Nielsen R (2013) Calculation of Tajima’s D and other  
429 neutrality test statistics from low depth next-generation sequencing data. *BMC bioinformatics*,  
430 **14**, 289.
- 431 Kousathanas A, Leuenberger C, Link V, Sell C, Burger J, Wegmann D (2017) Inferring Heterozy-  
432 gosity from Ancient and Low Coverage Genomes. *Genetics*, **205**, 317–332.
- 433 Lazaridis I (2018) The evolutionary history of human populations in Europe. *Current Opinion in*  
434 *Genetics & Development*, **53**, 21–27.
- 435 Lazaridis I, Patterson N, Mitnik A, *et al.* (2014) Ancient human genomes suggest three ancestral  
436 populations for present-day Europeans. *Nature*, **513**, 409–413.
- 437 Leek JT, Scharpf RB, Bravo HC, *et al.* (2010) Tackling the widespread and critical impact of batch  
438 effects in high-throughput data. *Nature Reviews Genetics*, **11**, 733–739.
- 439 Leigh DM, Lischer HEL, Grossen C, Keller LF (2018) Batch effects in a multiyear sequencing  
440 study: False biological trends due to changes in read lengths. *Molecular Ecology Resources*, **0**.
- 441 Li H, Durbin R (2009) Fast and accurate short read alignment with Burrows-Wheeler transform.  
442 *Bioinformatics (Oxford, England)*, **25**, 1754–1760.
- 443 Li H, Handsaker B, Wysoker A, *et al.* (2009) The Sequence Alignment/Map format and SAMtools.  
444 *Bioinformatics (Oxford, England)*, **25**, 2078–2079.
- 445 Lindo J, Huerta-Sánchez E, Nakagome S, *et al.* (2016) A time transect of exomes from a Native  
446 American population before and after European contact. *Nature Communications*, **7**, 13175.
- 447 Link V, Kousathanas A, Veeramah K, Sell C, Scheu A, Wegmann D (2017) ATLAS: analysis tools  
448 for low-depth and ancient samples. *bioRxiv*, S. 105346.
- 449 Mafessoni F, Prasad RB, Groop L, Hansson O, Prüfer K, McLysaght A (2018) Turning vice into  
450 virtue: Using Batch-Effects to Detect Errors in Large Genomic Datasets. *Genome Biology and*  
451 *Evolution*.

- 452 Mallick S, Li H, Lipson M, *et al.* (2016) The Simons Genome Diversity Project: 300 genomes from  
453 142 diverse populations. *Nature*, **538**, 201–206.
- 454 Martiniano R, Cassidy LM, Ó'Maoldúin R, *et al.* (2017) The population genomics of archaeological  
455 transition in west Iberia: Investigation of ancient substructure using imputation and haplotype-  
456 based methods. *PLoS genetics*, **13**, e1006852.
- 457 Mathieson I, Lazaridis I, Rohland N, *et al.* (2015) Genome-wide patterns of selection in 230 ancient  
458 Eurasians. *Nature*, **528**, 499–503.
- 459 McKenna A, Hanna M, Banks E, *et al.* (2010) The Genome Analysis Toolkit: A MapReduce  
460 framework for analyzing next-generation DNA sequencing data. *Genome Research*, **20**, 1297–  
461 1303.
- 462 Meyer M, Kircher M, Gansauge MT, *et al.* (2012) A high-coverage genome sequence from an archaic  
463 Denisovan individual. *Science (New York, N.Y.)*, **338**, 222–226.
- 464 Meynert AM, Bicknell LS, Hurles ME, Jackson AP, Taylor MS (2013) Quantifying single nucleotide  
465 variant detection sensitivity in exome sequencing. *BMC Bioinformatics*, **14**, 195.
- 466 Nielsen R, Akey JM, Jakobsson M, Pritchard JK, Tishkoff S, Willerslev E (2017) Tracing the  
467 peopling of the world through genomics. *Nature*, **541**, 302–310.
- 468 Nielsen R, Paul JS, Albrechtsen A, Song YS (2011) Genotype and SNP calling from next-generation  
469 sequencing data. *Nature Reviews Genetics*, **12**, 443.
- 470 Paten B, Novak AM, Eizenga JM, Garrison E (2017) Genome graphs and the evolution of genome  
471 inference. *Genome Research*, **27**, 665–676.
- 472 Patterson N, Moorjani P, Luo Y, *et al.* (2012) Ancient Admixture in Human History. *Genetics*,  
473 **192**, 1065–1093.
- 474 Petr M, Pääbo S, Kelso J, Vernot B (2018) The limits of long-term selection against Neandertal  
475 introgression. *bioRxiv*, S. 362566.
- 476 Prüfer K (2018) snpAD: An ancient DNA genotype caller. *Bioinformatics*.
- 477 Prüfer K, Filippo Cd, Grote S, *et al.* (2017) A high-coverage Neandertal genome from Vindija Cave  
478 in Croatia. *Science*, **358**, 655–658.
- 479 Prüfer K, Racimo F, Patterson N, *et al.* (2014) The complete genome sequence of a Neanderthal  
480 from the Altai Mountains. *Nature*, **505**, 43–9.
- 481 Prüfer K, Stenzel U, Hofreiter M, Pääbo S, Kelso J, Green RE (2010) Computational challenges  
482 in the analysis of ancient DNA. *Genome Biology*, **11**, R47.
- 483 Quail MA, Kozarewa I, Smith F, *et al.* (2008) A large genome center's improvements to the Illumina  
484 sequencing system. *Nature Methods*, **5**, 1005–1010.
- 485 Racimo F, Renaud G, Slatkin M (2016) Joint estimation of contamination, error and demography  
486 for nuclear DNA from ancient humans. *PLoS genetics*, **12**, e1005972.
- 487 Renaud G, Hanghøj K, Willerslev E, Orlando L (2017) gargammel: a sequence simulator for ancient  
488 DNA. *Bioinformatics*, **33**, 577–579.
- 489 Ros-Freixedes R, Battagin M, Johnsson M, *et al.* (2018) Impact of index hopping and bias towards  
490 the reference allele on accuracy of genotype calls from low-coverage sequencing. *bioRxiv*, S.  
491 358085.
- 492 Ross MG, Russ C, Costello M, *et al.* (2013) Characterizing and measuring bias in sequence data.  
493 *Genome Biology*, **14**, R51.
- 494 Scheib CL, Li H, Desai T, *et al.* (2018) Ancient human parallel lineages within North America  
495 contributed to a coastal expansion. *Science*, **360**, 1024–1027.

- 496 Schlebusch CM, Malmström H, Günther T, *et al.* (2017) Southern African ancient genomes estimate  
497 modern human divergence to 350,000 to 260,000 years ago. *Science (New York, N. Y.)*.
- 498 Schneeberger K, Hagmann J, Ossowski S, *et al.* (2009) Simultaneous alignment of short reads  
499 against multiple genomes. *Genome Biology*, **10**, R98.
- 500 Schubert M, Ginolhac A, Lindgreen S, *et al.* (2012) Improving ancient DNA read mapping against  
501 modern reference genomes. *BMC Genomics*, **13**, 178.
- 502 Shafer ABA, Peart CR, Tusso S, *et al.* (2016) Bioinformatic processing of RAD-seq data dramat-  
503 ically impacts downstream population genetic inference. *Methods in Ecology and Evolution*, **8**,  
504 907–917.
- 505 Shapiro B, Hofreiter M (2014) A paleogenomic perspective on evolution and gene function: new  
506 insights from ancient DNA. *Science (New York, N. Y.)*, **343**, 1236573.
- 507 Skoglund P, Mallick S, Bortolini MC, *et al.* (2015) Genetic evidence for two founding populations  
508 of the Americas. *Nature*, **525**, 104–108.
- 509 Skoglund P, Malmstrom H, Omrak A, *et al.* (2014) Genomic Diversity and Admixture Differs for  
510 Stone-Age Scandinavian Foragers and Farmers. *Science*, **344**, 747–750.
- 511 Skoglund P, Mathieson I (2018) Ancient Human Genomics: The First Decade. *Annual Review of*  
512 *Genomics and Human Genetics*, **19**, null.
- 513 Slatkin M, Racimo F (2016) Ancient DNA and human history. *Proceedings of the National Academy*  
514 *of Sciences of the United States of America*, **113**, 6380–6387.
- 515 Valdiosera C, Günther T, Vera-Rodríguez JC, *et al.* (2018) Four millennia of Iberian biomolecular  
516 prehistory illustrate the impact of prehistoric migrations at the far end of Eurasia. *Proceedings*  
517 *of the National Academy of Sciences*, S. 201717762.
- 518 Wang Y, Lu J, Yu J, Gibbs RA, Yu F (2013) An integrative variant analysis pipeline for accurate  
519 genotype/haplotype inference in population NGS data. *Genome Research*, **23**, 833–842.
- 520 Wu SH, Schwartz RS, Winter DJ, Conrad DF, Cartwright RA (2017) Estimating error models for  
521 whole genome sequencing using mixtures of Dirichlet-multinomial distributions. *Bioinformatics*,  
522 **33**, 2322–2329.
- 523 Zhou B, Wen S, Wang L, Jin L, Li H, Zhang H (2017) AntCaller: an accurate variant caller  
524 incorporating ancient DNA damage. *Molecular Genetics and Genomics*, **292**, 1419–1430.
