# Supplementary material for: The presence and impact of reference bias on population genomic studies of prehistoric human populations
Source: bioRxiv or medRxiv preprint supplement (doi:10.1101/487983), 2018-12-18

**Minimum BAQ 0**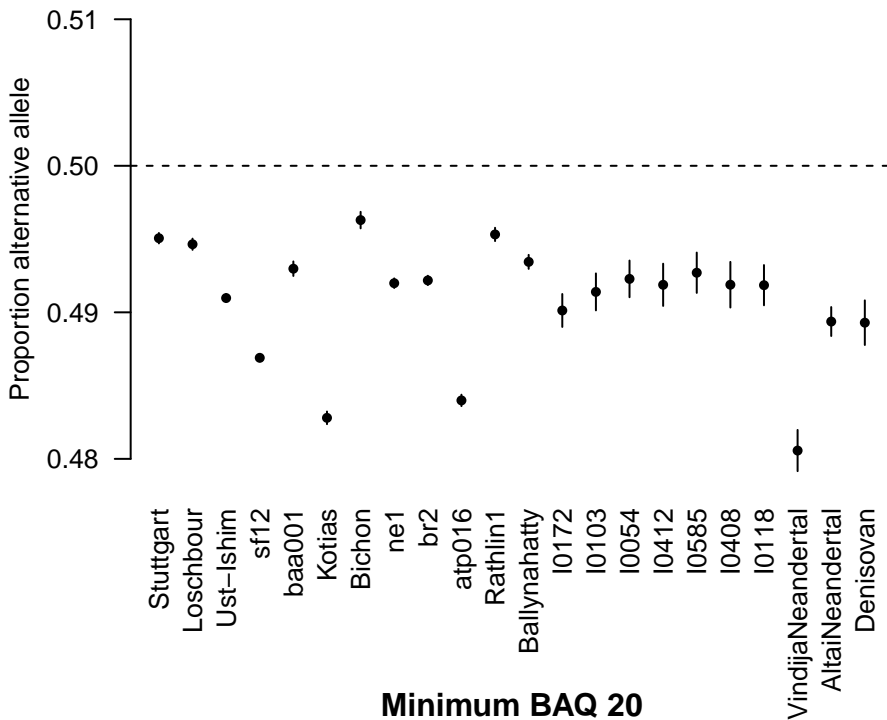**Minimum BAQ 10**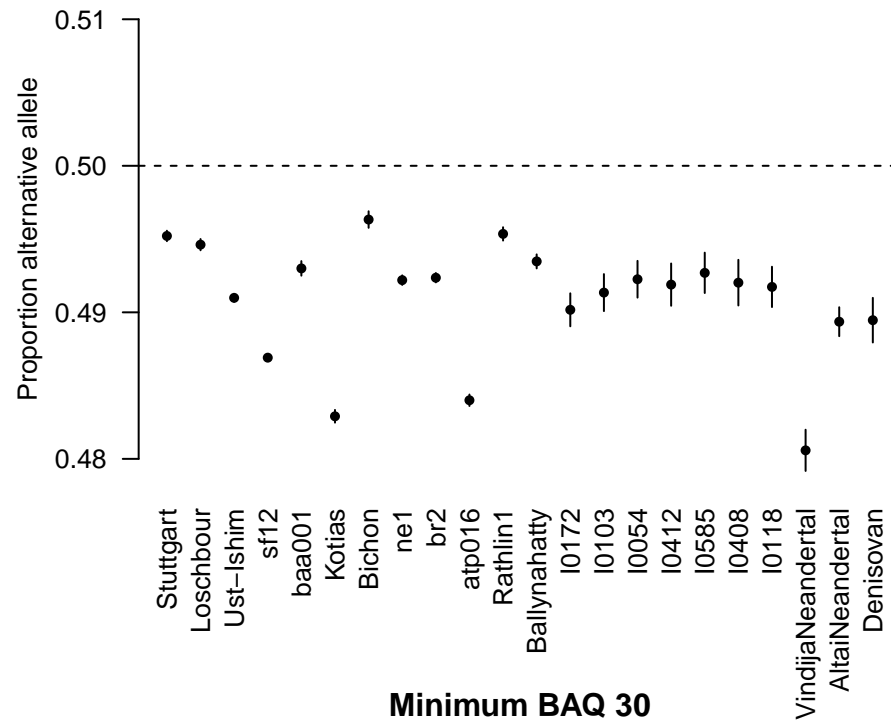**Minimum BAQ 20**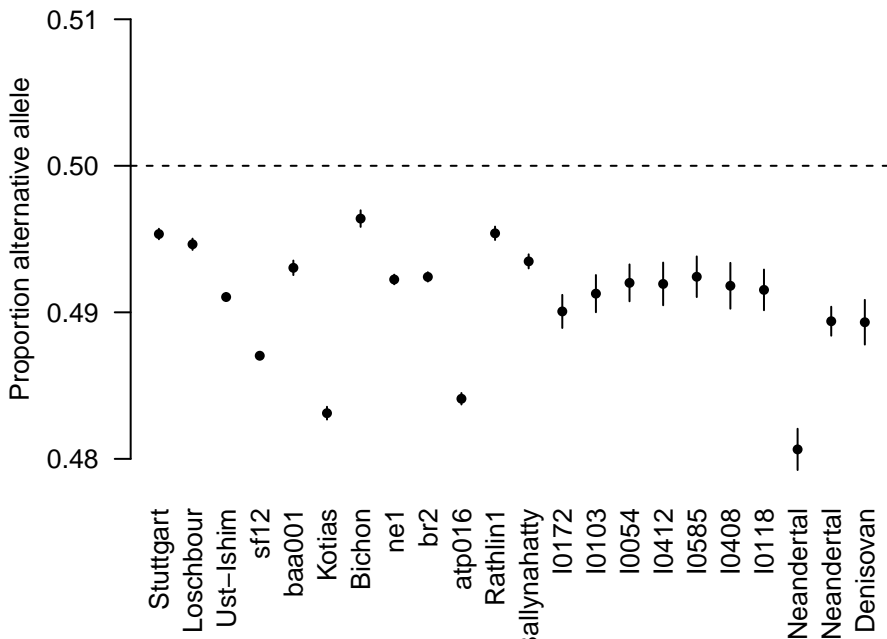**Minimum BAQ 30**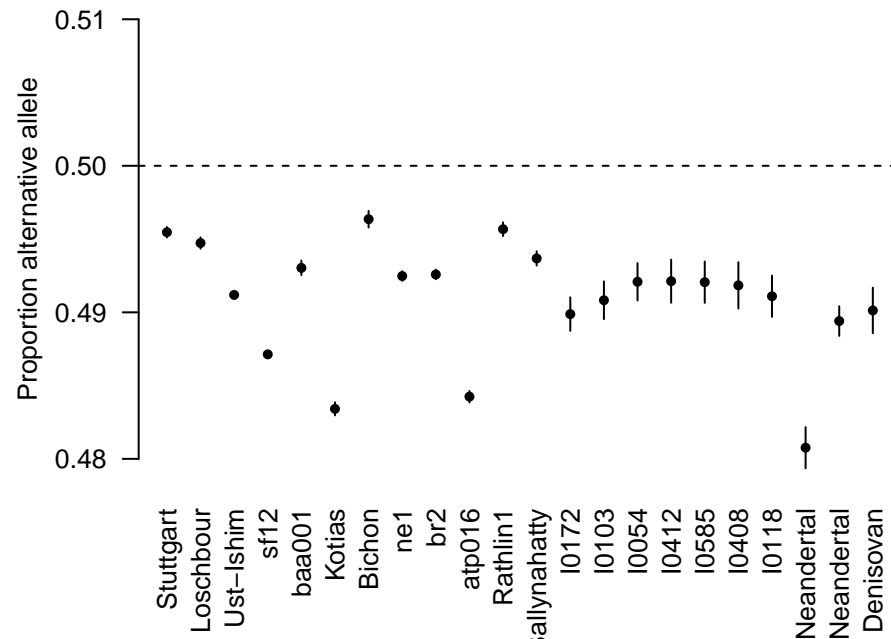

Supplement: Supplementary file [file media-1.pdf]
